# Supplementary material
Source: PubMed Central journal article supplement (PMC4484821)
Supplement: mmc1.pdf [file mmc1.pdf]

**SUPPLEMENTAL MATERIAL**

**SIX FIGURES**

**EIGHTEEN TABLES**

## **SUPPLEMENTAL FIGURE LEGENDS AND FIGURES 1-6**

**Figure S1. Genotype concordance of WGS from matched lymphoblast and fibroblast samples.** Quality scores calculated by Complete Genomics, Inc were used to filter genome-wide variants. Scores ranging from 50-100 were used and compared to no quality score filtering ("0"). Filtering for quality scores greater than 50 had little effect on genotype concordance for SNPs; however, genotype concordance for indels was still poor at a quality score threshold of 100. Average genotype concordance and standard error for all variants (black), SNPs alone (Blue) and indels alone (red) calculated from seven individuals are shown.

**Figure S2. Genotype Concordance for genome-wide indels identified by WGS.**

Average genotype concordance and standard error for indels identified from matched fibroblast and lymphoblast samples from seven individuals was calculated after quality score filtering. No quality score filtering ("0") is shown with results from filtering quality scores between 50 and 300. Genotype concordance (black) is shown with the proportion of variants remaining after quality filtering (red). Majority of indel variants were excluded to achieve reasonable genotype concordance.

**Figure S3. Pedigree of the *BRCA1* 5382insC family with a *CREBBP* p.N1978S**

**mutation.** The four generation pedigree of the *CREBBP* p.Asn1978Ser family with pertinent medical information is shown. Patient identifiers in each generation (generation numbers I-IV to the left of the figure) are located below each symbol. Patient ages at the time of death, if known, are located to the upper right of each symbol. A diagonal line indicates deceased individuals. (*CREBBP* mt) is positive for the *CREBBP* p.Asn1978Ser mutation and (*CREBBP* wt) is wild type *CREBBP*.

**Figure S4. Pedigree of the *BRCA1* 2576delC family with the *PRSS1* p.N29I mutation.**

The four generation pedigree of the *PRSS1* p.Asn29Ile family with pertinent medical information is shown. Patient identifiers in each generation (generation numbers I-IV to the left of the figure) are located below each symbol. Patient ages at the time of death, if known, are located to the upper right of each symbol. The two patients with an asterisk (\*) to the upper left were analyzed with WGS. (PRSS1 mt) is positive for the *PRSS1* p.Asn29Ile mutation and (PRSS1 wt) is wild type *PRSS1*.

**Figure S5. Number of PPVs in each of the 163 disease-genes as they relate to coding region length.**

- A)** Number of all PPVs in each gene in the *BRCA1/2* cohort. R-square= 0.6082;
  - B)** Number of LoF PPVs in each gene in the *BRCA1/2* cohort. R-square= 0.1088;
  - C)** Number of all PPVs in each gene in the non-*BRCA* cohort. R-square= 0.5217;
  - D)** Number of LoF PPVs in each gene in the non-*BRCA* cohort. R-square= 0.05069;
- R-square is the correlation coefficient.

**Figure S6. CADD score distribution of all PPVs identified by WGS in all 258 patients.**

The distribution of SNV Phred-scaled CADD scores is shown by variant class for variants identified in the **(A)** selected 163 disease-gene panel and **(B)** all ClinVar genes. As expected, nonsense variant CADD scores were higher than missense variants often defined as variants of unknown significance. LoF PPVs reported as clinically significant in Tables 2 and 3 are red.

**SUPPLEMENTAL FIGURES 1-6**

**Supplemental Figure 1**

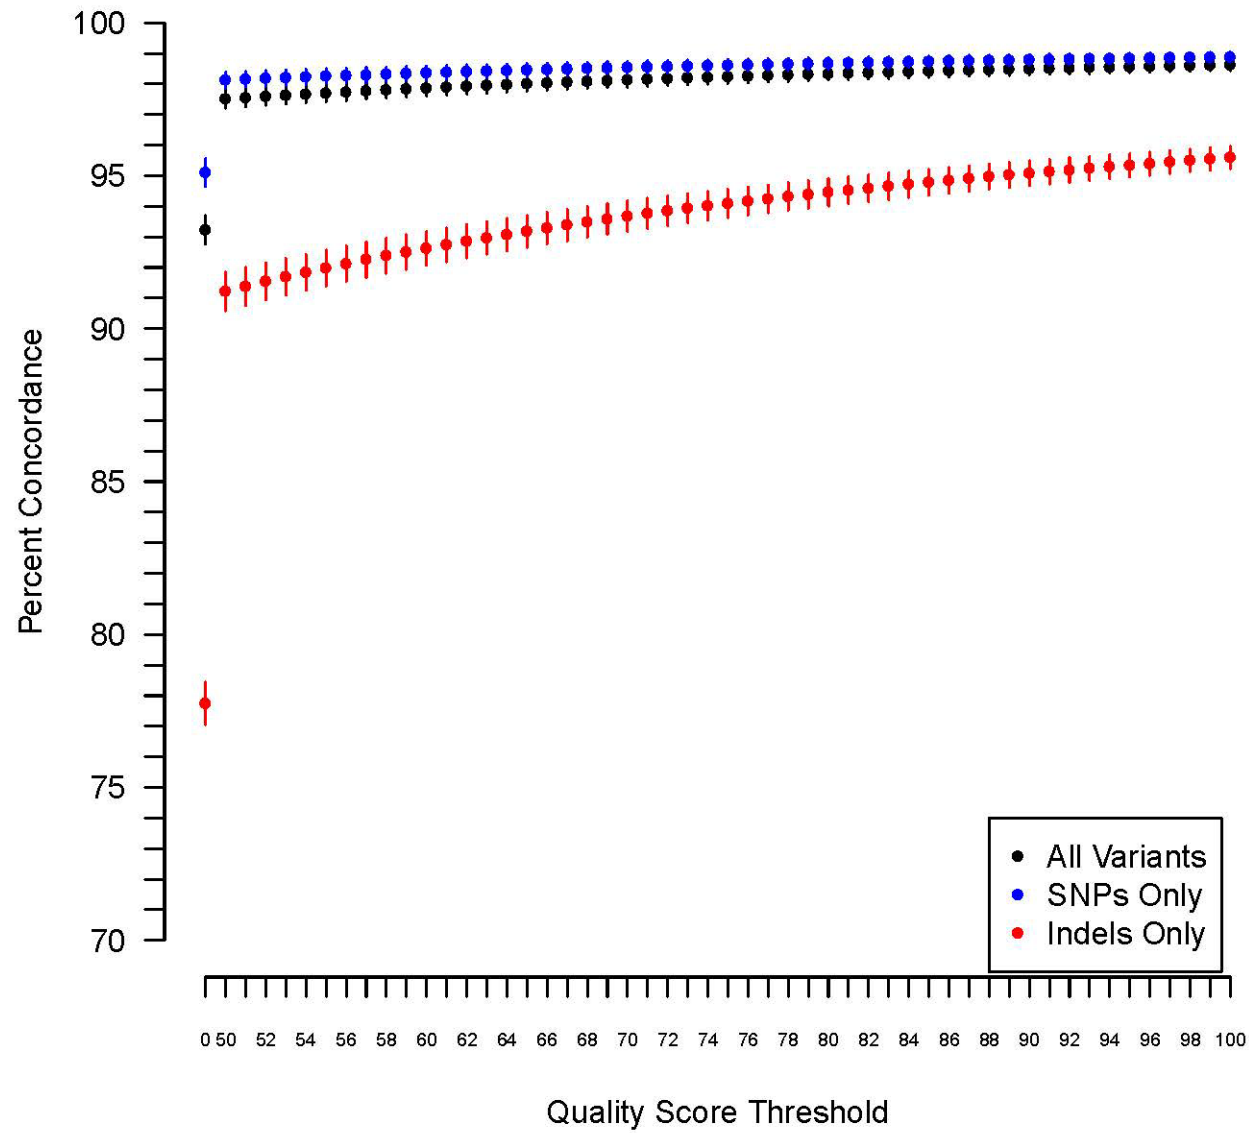

Supplemental Figure 2

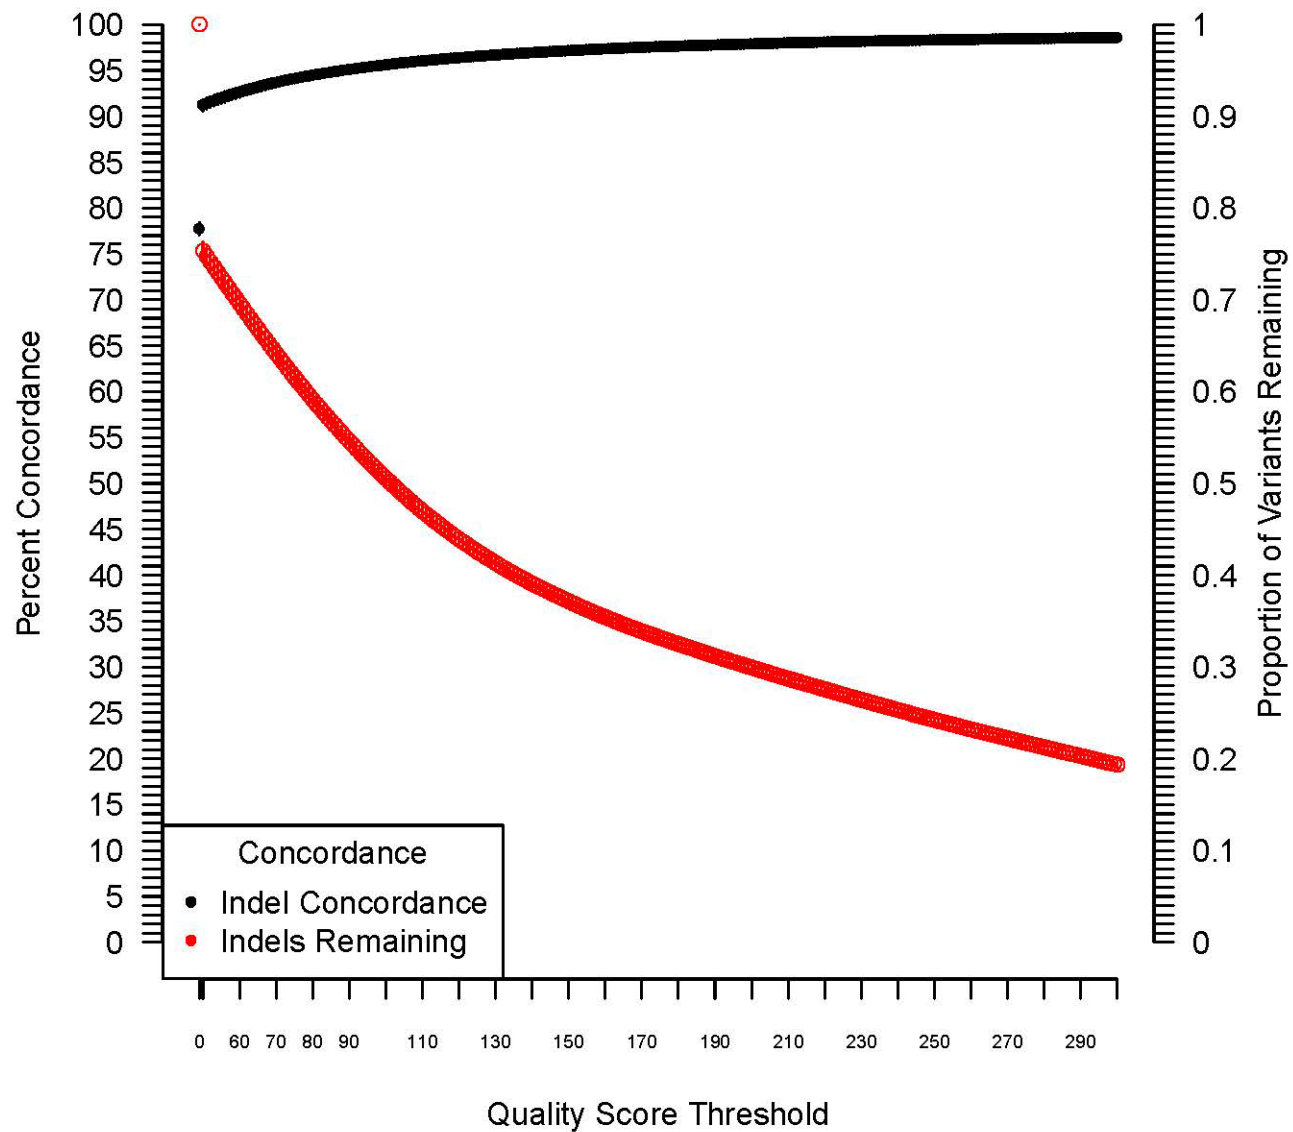

# Supplemental Figure 3

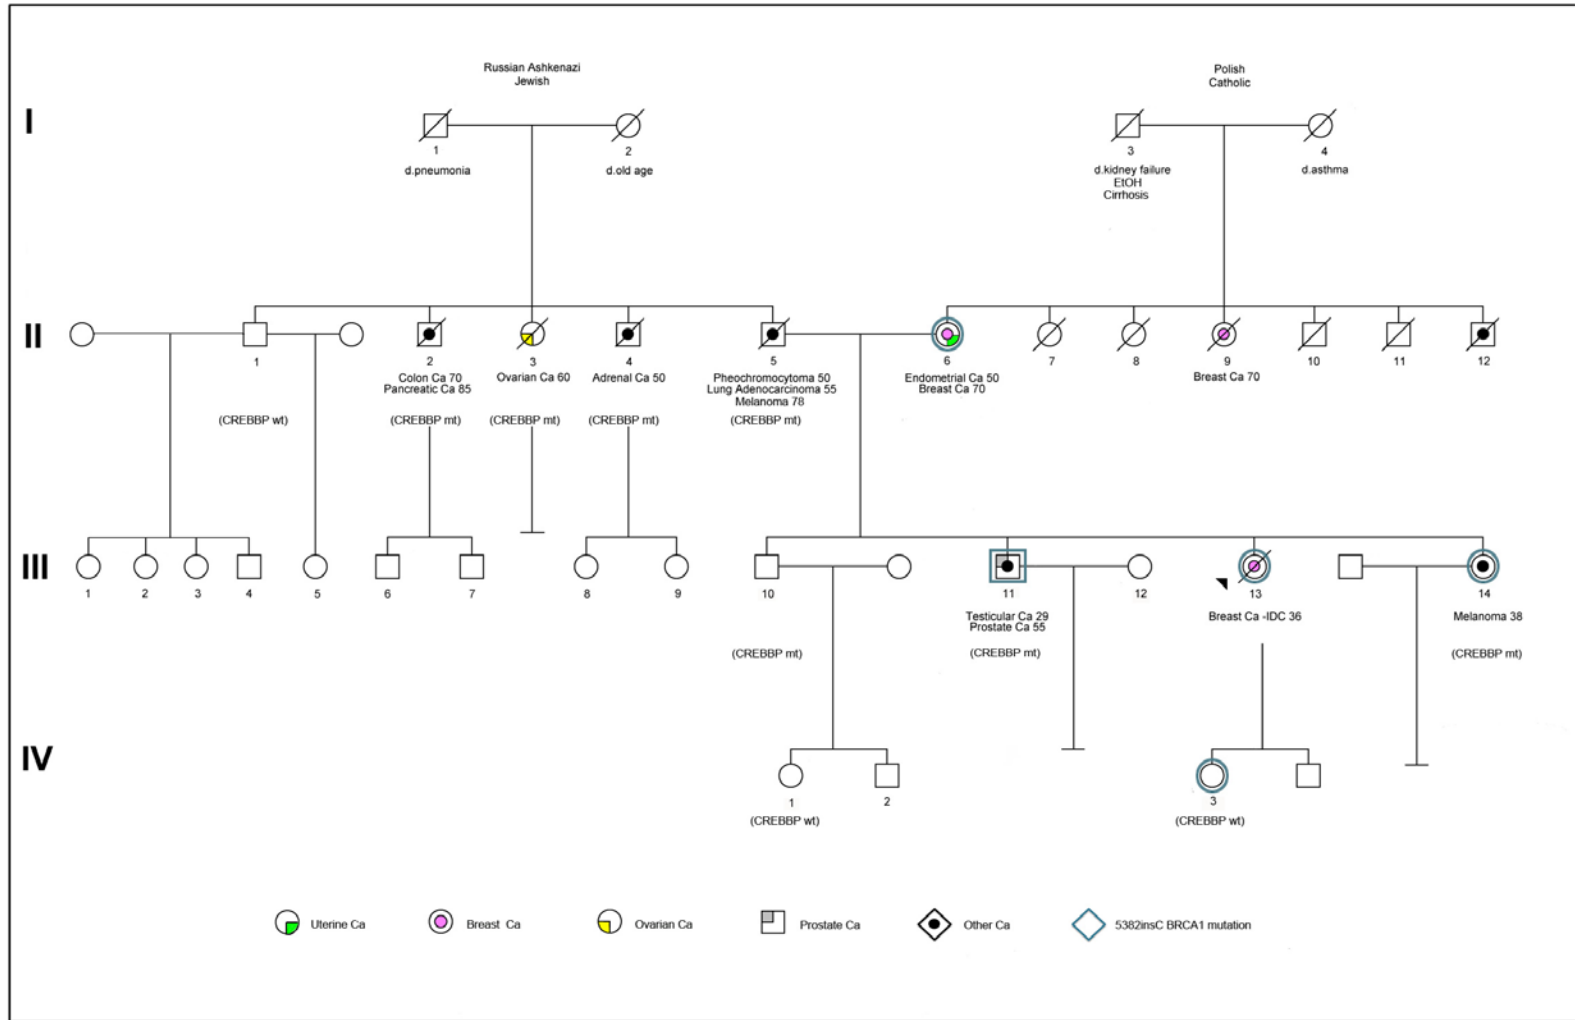

Supplemental Figure 4

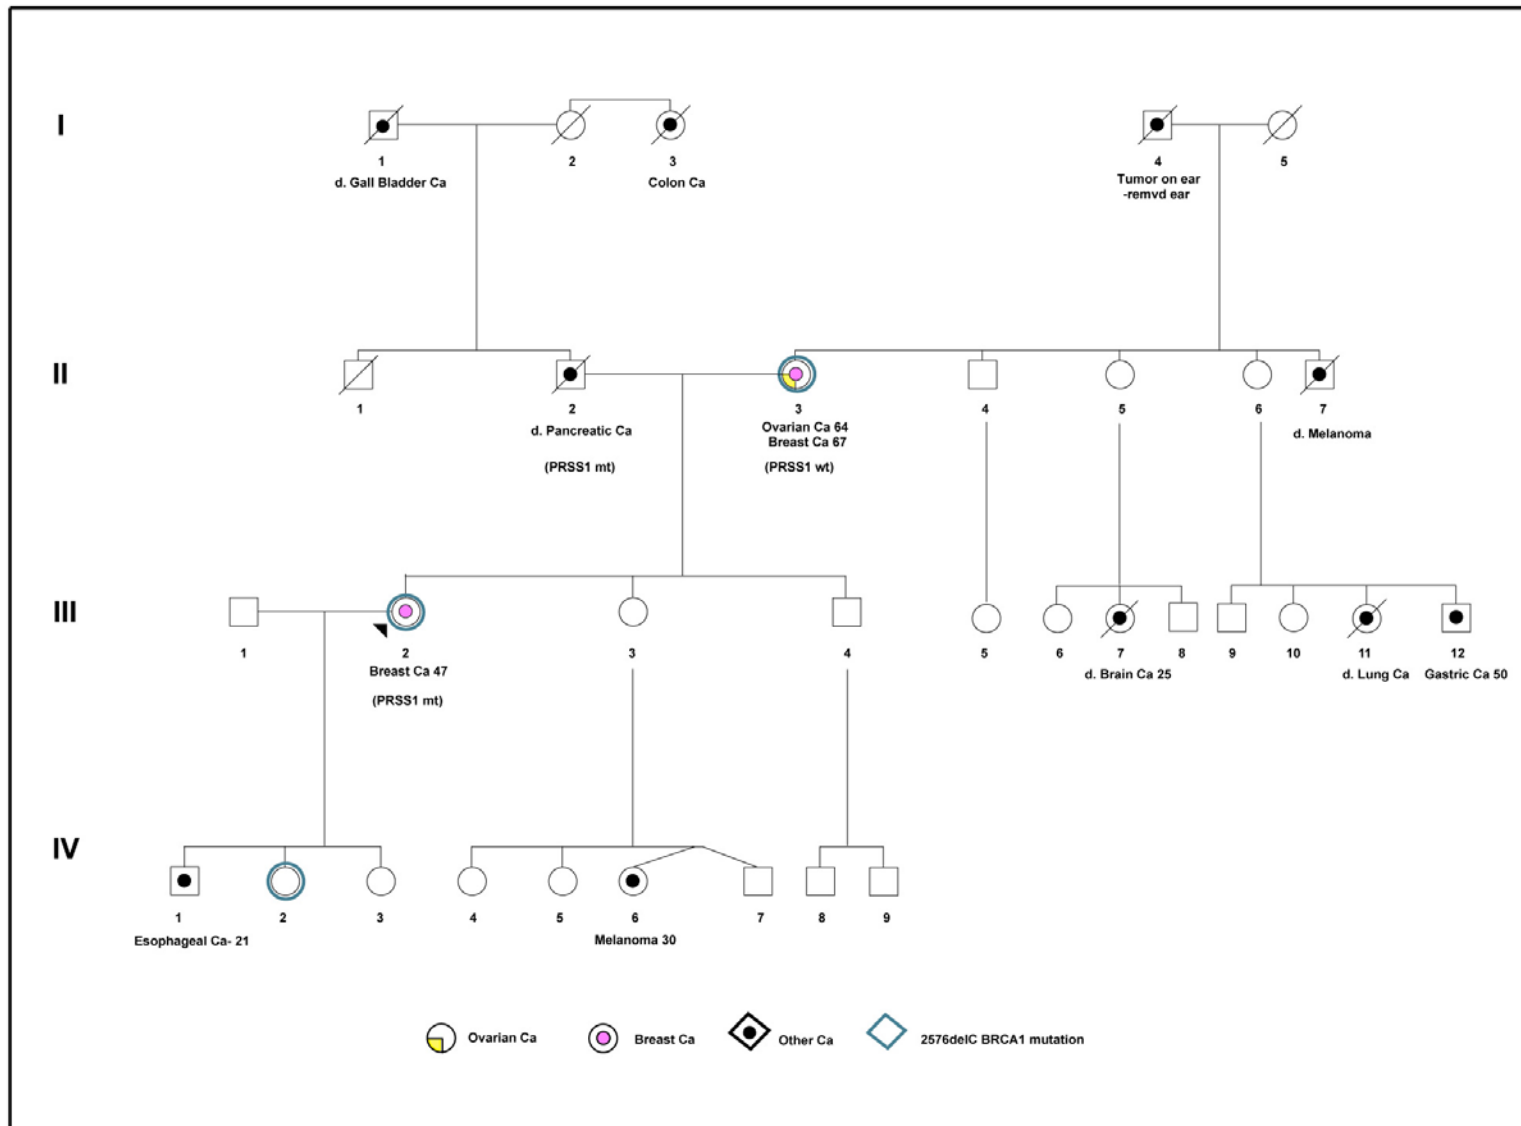

Supplemental Figure 5

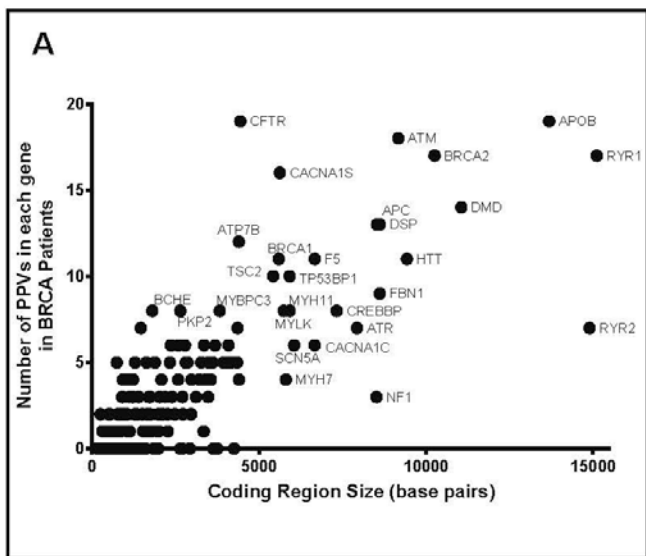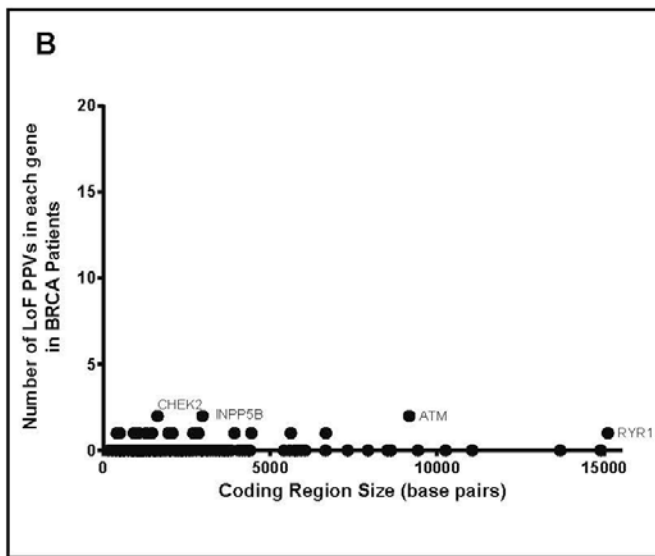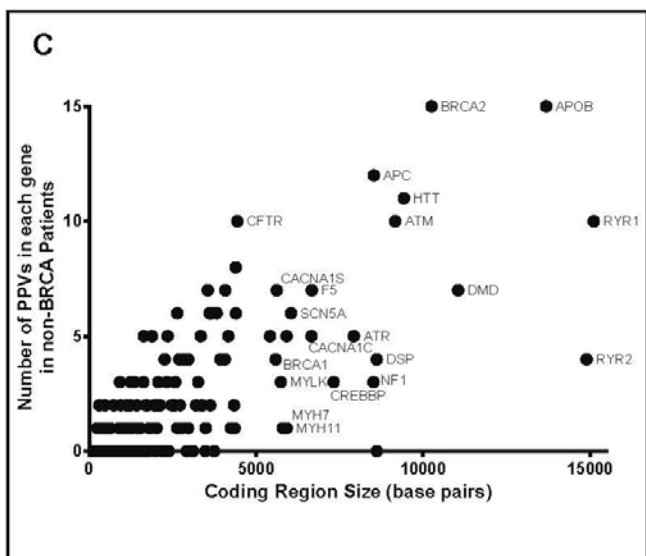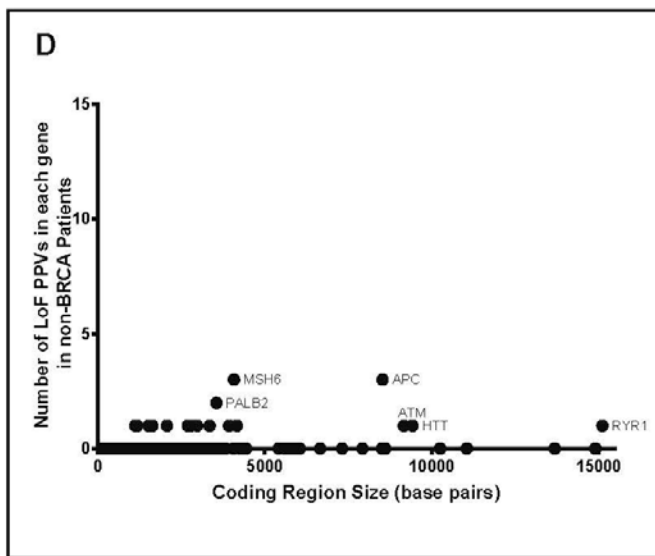



Supplemental Figure 6

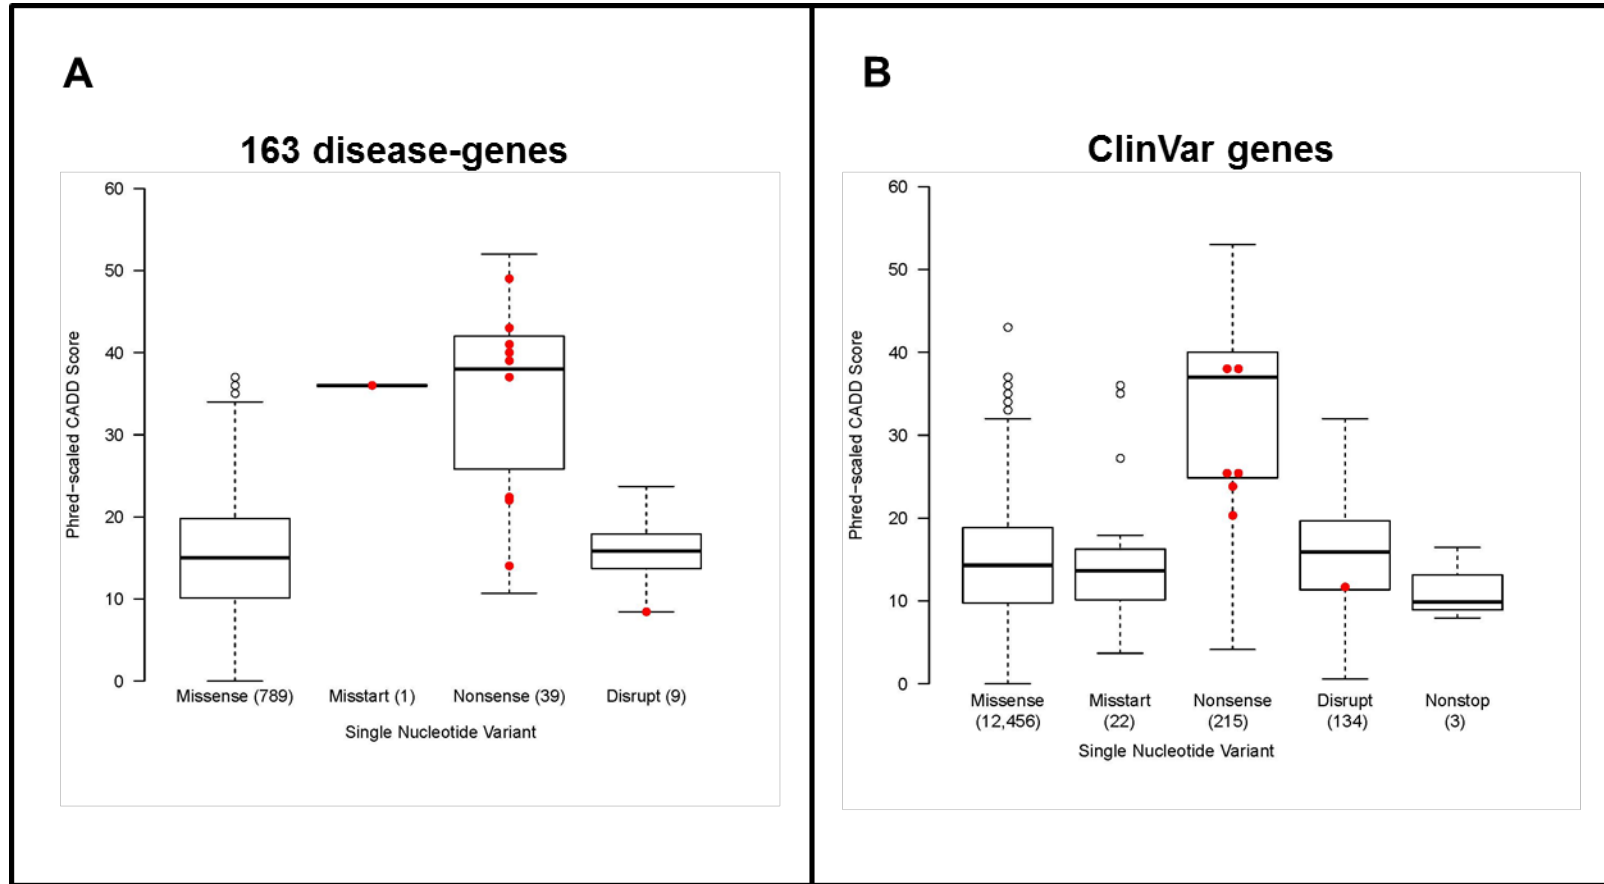

**SUPPLEMENTAL TABLES 1-18**

Table S1. Summary of Sequencing Statistics

| Sample_ID             | CGI_Gender | Percent of Exome Fully Sequenced | Percent of Exome Fully Sequenced | Total Sequence (Gb) | Percent of Genome Coverage |              |              |              | Percent of Exome Coverage |             |              |              | Transition/Transversion Ratio |              | Synonymous SNVs | Nonsynonymous SNVs | Synonymous/ Nonsynonymous Ratio | Missense SNVs | Nonsense SNVs | Nonstop SNVs | Mastart SNVs | Splice SNVs | Frameshift Insertion | Frameshift Deletion | Frameshift Substitution |        |       |
|-----------------------|------------|----------------------------------|----------------------------------|---------------------|----------------------------|--------------|--------------|--------------|---------------------------|-------------|--------------|--------------|-------------------------------|--------------|-----------------|--------------------|---------------------------------|---------------|---------------|--------------|--------------|-------------|----------------------|---------------------|-------------------------|--------|-------|
|                       |            |                                  |                                  |                     | At least 5x                | At least 10x | At least 20x | At least 30x | At least 40x              | At least 5x | At least 10x | At least 20x | At least 30x                  | At least 40x |                 |                    |                                 |               |               |              |              |             |                      |                     |                         | Genome | Exome |
| Median of All Samples |            | 96.6                             | 98                               | 158.2125            | 99.3                       | 98.3         | 93.05        | 81           | 61.2                      | 99.5        | 98.7         | 94.3         | 84                            | 66.2         | 2.142           | 3.071              | 10391.75                        | 9530.5        | 1.09          | 9430.5       | 73           | 11          | 19                   | 72                  | 67                      | 71     | 20    |
| BRCA1.1               | FEMALE     | 96.9                             | 98.3                             | 159.164             | 99.4                       | 98.6         | 94.4         | 83.8         | 64                        | 99.6        | 98.9         | 95           | 85.4                          | 67.5         | 2.136           | 3.042              | 10391                           | 9584          | 1.08          | 9462         | 76           | 12          | 14                   | 70                  | 67                      | 78     | 14    |
| BRCA1.2               | FEMALE     | 96.8                             | 98.2                             | 158.047             | 99.4                       | 98.5         | 94.2         | 83           | 62.6                      | 99.6        | 98.9         | 95.7         | 85.3                          | 67           | 2.136           | 3.048              | 10437                           | 9553          | 1.08          | 9553         | 76           | 16          | 18                   | 69                  | 68                      | 79     | 15    |
| BRCA1.3               | FEMALE     | 96.9                             | 98.2                             | 161.183             | 99.4                       | 98.6         | 94.6         | 84.6         | 65.8                      | 99.6        | 98.9         | 95.1         | 85.8                          | 68.4         | 2.141           | 3.096              | 10454                           | 9685          | 1.08          | 9583         | 74           | 9           | 19                   | 64                  | 65                      | 67     | 23    |
| BRCA1.4               | FEMALE     | 96.8                             | 98.2                             | 157.815             | 99.4                       | 98.5         | 94           | 82.9         | 62.7                      | 99.6        | 98.9         | 95           | 85.3                          | 67.5         | 2.141           | 3.042              | 10398                           | 9450          | 1.11          | 9342         | 79           | 14          | 15                   | 70                  | 68                      | 63     | 23    |
| BRCA1.5               | FEMALE     | 96.9                             | 98.2                             | 161.529             | 99.4                       | 98.6         | 94.6         | 84.6         | 65.9                      | 99.6        | 98.8         | 94.9         | 85.3                          | 67.6         | 2.134           | 3.118              | 10505                           | 9667          | 1.08          | 9447         | 88           | 12          | 20                   | 78                  | 67                      | 68     | 23    |
| BRCA1.6               | FEMALE     | 96.2                             | 97.3                             | 142.966             | 99.3                       | 98.2         | 91.9         | 76.4         | 51.9                      | 99.5        | 98.2         | 92.8         | 78.1                          | 64.6         | 2.145           | 3.113              | 10626                           | 9446          | 1.11          | 9441         | 69           | 11          | 21                   | 73                  | 62                      | 63     | 15    |
| BRCA1.7               | MALE       | 96.5                             | 97.7                             | 146.126             | 99.3                       | 98.1         | 90.8         | 75.3         | 52.4                      | 99.5        | 98.6         | 93.5         | 81.1                          | 59.9         | 2.146           | 3.075              | 10147                           | 9250          | 1.11          | 9151         | 67           | 13          | 19                   | 59                  | 61                      | 68     | 16    |
| BRCA1.8               | FEMALE     | 96.4                             | 97.7                             | 147.853             | 99.3                       | 98.4         | 92.7         | 78.6         | 54.7                      | 99.5        | 98.5         | 93.2         | 80.5                          | 58.5         | 2.142           | 3.075              | 10229                           | 9491          | 1.08          | 9384         | 78           | 11          | 18                   | 65                  | 57                      | 56     | 17    |
| BRCA1.9               | FEMALE     | 96.3                             | 97.8                             | 146.874             | 99.3                       | 98.3         | 92.9         | 77.5         | 53.3                      | 99.5        | 98.6         | 93.6         | 80.9                          | 59.2         | 2.145           | 3.129              | 10602                           | 9753          | 1.09          | 9663         | 80           | 14          | 22                   | 74                  | 70                      | 71     | 14    |
| BRCA1.10              | FEMALE     | 96.1                             | 97.6                             | 144.684             | 99.3                       | 98.2         | 91.9         | 76.5         | 51.9                      | 99.5        | 98.6         | 93.3         | 80.3                          | 58.4         | 2.147           | 3.104              | 10229                           | 9446          | 1.11          | 9158         | 74           | 10          | 19                   | 67                  | 67                      | 85     | 26    |
| BRCA1.11              | MALE       | 96.5                             | 97.6                             | 145.452             | 99.3                       | 98.1         | 90.8         | 75.3         | 52.3                      | 99.5        | 98.5         | 93.2         | 80.7                          | 58.9         | 2.142           | 3.093              | 10006                           | 9242          | 1.08          | 9148         | 66           | 9           | 19                   | 79                  | 62                      | 54     | 19    |
| BRCA1.12              | FEMALE     | 96.3                             | 97.5                             | 146.365             | 99.3                       | 98.3         | 92.6         | 78.1         | 53.9                      | 99.5        | 98.5         | 93           | 79.9                          | 57.7         | 2.144           | 3.138              | 12610                           | 11315         | 1.11          | 11191        | 87           | 15          | 22                   | 87                  | 71                      | 89     | 20    |
| BRCA1.13              | FEMALE     | 96.8                             | 98.1                             | 157.261             | 99.4                       | 98.5         | 94.1         | 82.9         | 62.6                      | 99.6        | 98.6         | 94.6         | 84                            | 62.6         | 2.14            | 3.037              | 10460                           | 9466          | 1.11          | 9358         | 78           | 11          | 19                   | 76                  | 78                      | 70     | 18    |
| BRCA1.15              | FEMALE     | 96.8                             | 98.2                             | 159.495             | 99.4                       | 98.6         | 94.3         | 83.7         | 64                        | 99.6        | 98.9         | 95.1         | 85.6                          | 67.8         | 2.138           | 3.071              | 10554                           | 9791          | 1.08          | 9683         | 76           | 13          | 19                   | 75                  | 77                      | 54     | 22    |
| BRCA1.16              | FEMALE     | 96.6                             | 97.7                             | 153.634             | 99.2                       | 98.1         | 92.4         | 79.9         | 60                        | 99.4        | 98.3         | 93.6         | 83                            | 65.3         | 2.145           | 3.009              | 10494                           | 9583          | 1.1           | 9465         | 85           | 12          | 21                   | 67                  | 54                      | 57     | 13    |
| BRCA1.17              | FEMALE     | 96.6                             | 97.8                             | 158.236             | 99.2                       | 98.2         | 93.1         | 81.9         | 63.4                      | 99.4        | 98.4         | 93.8         | 84                            | 67.3         | 2.148           | 3.074              | 10326                           | 9504          | 1.09          | 9394         | 81           | 9           | 20                   | 76                  | 61                      | 56     | 21    |
| BRCA1.19              | FEMALE     | 96.7                             | 98.1                             | 155.265             | 99.3                       | 98.4         | 93.5         | 81.5         | 60.7                      | 99.6        | 98.9         | 94.5         | 84.1                          | 65.5         | 2.14            | 3.086              | 10368                           | 9433          | 1.12          | 9328         | 72           | 11          | 22                   | 66                  | 78                      | 66     | 23    |
| BRCA1.19              | FEMALE     | 96.6                             | 97.8                             | 152.428             | 99.2                       | 98.1         | 92.5         | 79.6         | 58.8                      | 99.4        | 98.4         | 93.8         | 83.2                          | 65.2         | 2.145           | 3.173              | 10337                           | 9217          | 1.12          | 9103         | 80           | 11          | 23                   | 74                  | 60                      | 60     | 20    |
| BRCA1.22              | FEMALE     | 96.7                             | 98                               | 154.522             | 99.3                       | 98.4         | 93.4         | 81.1         | 59.6                      | 99.6        | 98.8         | 94.3         | 83.4                          | 63.9         | 2.143           | 3.083              | 10345                           | 9569          | 1.08          | 9464         | 71           | 14          | 20                   | 68                  | 79                      | 76     | 21    |
| BRCA1.23              | FEMALE     | 96.7                             | 98.3                             | 155.686             | 99.3                       | 98.4         | 93.3         | 81           | 60                        | 99.7        | 99           | 95.5         | 86.1                          | 68.8         | 2.142           | 3.045              | 10503                           | 9715          | 1.08          | 9601         | 78           | 14          | 22                   | 76                  | 59                      | 73     | 28    |
| BRCA1.24              | FEMALE     | 96.7                             | 97.8                             | 158.207             | 99.2                       | 98.2         | 93.2         | 82           | 63.7                      | 99.4        | 98.4         | 94           | 84.2                          | 67.6         | 2.143           | 3.035              | 10298                           | 9550          | 1.08          | 9453         | 68           | 10          | 19                   | 65                  | 67                      | 67     | 19    |
| BRCA1.26              | FEMALE     | 96.7                             | 98.3                             | 155.976             | 99.3                       | 98.4         | 93.6         | 81.5         | 60.3                      | 99.6        | 98.9         | 95.1         | 85                            | 66.6         | 2.139           | 3.029              | 10416                           | 9546          | 1.09          | 9438         | 75           | 11          | 22                   | 55                  | 72                      | 73     | 24    |
| BRCA1.27              | FEMALE     | 96.5                             | 98.1                             | 150.109             | 99.3                       | 98.4         | 92.9         | 79.1         | 56                        | 99.6        | 98.9         | 94.8         | 83.9                          | 64.2         | 2.142           | 3.063              | 10466                           | 9440          | 1.11          | 9341         | 70           | 11          | 18                   | 70                  | 65                      | 75     | 18    |
| BRCA1.28              | FEMALE     | 96.6                             | 98.1                             | 152.51              | 99.3                       | 98.4         | 93.2         | 80.6         | 58.7                      | 99.6        | 98.8         | 94.5         | 83.7                          | 64.5         | 2.138           | 3.121              | 10355                           | 9483          | 1.09          | 9370         | 82           | 11          | 20                   | 68                  | 57                      | 81     | 24    |
| BRCA1.29              | FEMALE     | 96.7                             | 98.1                             | 156.617             | 99.3                       | 98.4         | 93.5         | 82           | 61.9                      | 99.6        | 98.9         | 94.5         | 84.4                          | 65.3         | 2.137           | 3.068              | 10443                           | 9566          | 1.08          | 9568         | 70           | 11          | 17                   | 72                  | 79                      | 60     | 24    |
| BRCA1.30              | FEMALE     | 96.6                             | 97.8                             | 158.001             | 99.2                       | 98.1         | 93           | 81.8         | 63.5                      | 99.4        | 98.4         | 94           | 84.2                          | 67.7         | 2.145           | 3.12               | 10375                           | 9469          | 1.1           | 9381         | 61           | 10          | 17                   | 76                  | 60                      | 55     | 18    |
| BRCA1.31              | FEMALE     | 96.6                             | 97.9                             | 156.934             | 99.2                       | 98.1         | 92.6         | 80.3         | 60.9                      | 99.4        | 98.5         | 94.2         | 84.4                          | 67.9         | 2.145           | 3.081              | 10391                           | 9490          | 1.09          | 9380         | 80           | 12          | 18                   | 68                  | 63                      | 66     | 14    |
| BRCA1.32              | FEMALE     | 96.7                             | 97.9                             | 156.398             | 99.3                       | 98.4         | 93.5         | 81.9         | 61.9                      | 99.5        | 98.5         | 94.4         | 84.8                          | 67.5         | 2.146           | 3.078              | 10481                           | 9545          | 1.1           | 9448         | 67           | 13          | 17                   | 69                  | 65                      | 55     | 18    |
| BRCA1.33              | FEMALE     | 96.3                             | 97.7                             | 146.44              | 99.3                       | 98.2         | 92.4         | 78.4         | 52.8                      | 99.6        | 98.6         | 92.4         | 80.8                          | 58.7         | 2.146           | 3.075              | 10194                           | 9638          | 1.08          | 9638         | 78           | 11          | 21                   | 64                  | 61                      | 9      | 9     |
| BRCA1.34              | FEMALE     | 96.8                             | 98.3                             | 158.775             | 99.3                       | 98.5         | 93.8         | 82.4         | 62.3                      | 99.7        | 99           | 95.5         | 86.4                          | 69.5         | 2.143           | 3.068              | 10541                           | 9608          | 1.1           | 9507         | 68           | 11          | 22                   | 76                  | 77                      | 88     | 33    |
| BRCA1.36              | FEMALE     | 96.5                             | 97.9                             | 153.16              | 99.2                       | 98           | 92.2         | 79.5         | 59.7                      | 99.4        | 98.5         | 93.8         | 83.2                          | 65.7         | 2.146           | 3.041              | 10381                           | 9469          | 1.09          | 9375         | 65           | 9           | 20                   | 72                  | 62                      | 62     | 15    |
| BRCA1.40              | FEMALE     | 96.7                             | 98.2                             | 153.735             | 99.3                       | 98.4         | 93.2         | 80.6         | 58.7                      | 99.6        | 98.9         | 95           | 84.7                          | 66.1         | 2.14            | 3.077              | 10491                           | 9722          | 1.08          | 9617         | 78           | 8           | 19                   | 70                  | 73                      | 75     | 20    |
| BRCA1.41              | FEMALE     | 96.8                             | 98.3                             | 159.202             | 99.3                       | 98.5         | 94           | 83           | 63.5                      | 99.6        | 98.9         | 95.1         | 86.6                          | 68.6         | 2.142           | 3.019              | 10310                           | 9438          | 1.08          | 9341         | 70           | 10          | 17                   | 80                  | 74                      | 78     | 27    |
| BRCA1.42              | FEMALE     | 96.7                             | 98.2                             | 156.438             | 99.3                       | 98.4         | 93.6         | 82.1         | 61.6                      | 99.6        | 98.9         | 95           | 85.3                          | 67.5         | 2.137           | 3.026              | 10506                           | 9556          | 1.09          | 9558         | 69           | 9           | 21                   | 65                  | 79                      | 80     | 14    |
| BRCA1.44              | FEMALE     | 96.8                             | 98.3                             | 160.148             | 99.3                       | 98.4         | 93.7         | 82.6         | 63.3                      | 99.6        | 98.9         | 95.1         | 85.8                          | 69.1         | 2.139           | 3.065              | 10388                           | 9490          | 1.09          | 9382         | 76           | 13          | 19                   | 73                  | 76                      | 68     | 25    |
| BRCA1.46              | FEMALE     | 96.8                             | 98.2                             | 160.188             | 99.3                       | 98.4         | 93.3         | 82.6         | 64                        | 99.6        | 98.9         | 94.7         | 84.9                          | 67.6         | 2.138           | 3.011              | 10356                           | 9562          | 1.08          | 9562         | 69           | 12          | 16                   | 64                  | 65                      | 61     | 9     |
| BRCA1.47              | FEMALE     | 96.6                             | 97.9                             | 153.119             | 99.2                       | 98.1         | 92.5         | 79.8         | 59.3                      | 99.4        | 98.5         | 94.1         | 83.8                          | 66.2         | 2.143           | 3.069              | 10305                           | 9584          | 1.08          | 9477         | 75           | 11          | 21                   | 73                  | 69                      | 59     | 16    |
| BRCA1.48              | FEMALE     | 96.8                             | 98.1                             | 142.914             | 99.3                       | 98.1         | 91.2         | 74.5         | 49.7                      | 99.6        | 98.8         | 94.1         | 81.5                          | 60.7         | 2.149           | 3.081              | 10496                           | 9515          | 1.1           | 9418         | 71           | 7           | 19                   | 83                  | 61                      | 77     | 23    |
| BRCA1.49              | FEMALE     | 96.2                             | 97.9                             | 143.558             | 99.3                       | 98.3         | 92           | 76.4         | 51.7                      | 99.6        | 98.8         | 94.2         | 82.1                          | 61           | 2.147           | 3.082              | 10282                           | 9394          | 1.09          | 9299         | 67           | 12          | 16                   | 80                  | 65                      | 75     | 13    |
| BRCA1.50              | FEMALE     | 96.8                             | 98.2                             | 162.028             | 99.4                       | 98.5         | 94.4         | 84.4         | 65.9                      | 99.6        | 98.9         | 95.1         | 85.9                          | 69           | 2.136           | 3.046              | 10316                           | 9563          | 1.08          | 9463         | 71           | 6           | 20                   | 80                  | 65                      | 72     | 25    |
| BRCA1.52              | FEMALE     | 96.8                             | 98.2                             | 161.1               | 99.4                       | 98.5         | 94.2         | 83.7         | 64.9                      | 99.6        | 98.9         | 95           | 85.7                          | 68.7         | 2.14            | 3.062              | 10279                           | 9505          | 1.08          | 9403         | 68           | 15          | 19                   | 70                  | 74                      | 75     | 25    |
| BRCA1.53              | FEMALE     | 96.5                             | 97.8                             | 158.729             | 99.2                       | 98.1         | 92.6         | 81           | 63                        | 99.4        | 98.4         | 93.8         | 83.8                          | 67.6         | 2.143           | 3.07               | 10526                           | 9711          | 1.08          | 9602         | 76           | 12          | 21                   | 70                  | 62                      | 56     | 19    |
| BRCA1.55              | FEMALE     | 96.6                             | 97.6                             |                     |                            |              |              |              |                           |             |              |              |                               |              |                 |                    |                                 |               |               |              |              |             |                      |                     |                         |        |       |

Table S1 continued

| Sample_ID                    | CGI_Gender | Percent of Genome Fully Sequenced | Percent of Exome Fully Sequenced | Total Sequence (Gb) | Percent of Genome Coverage |              |              |              |             | Percent of Exome Coverage |              |              |              |       | Transition/Transversion Ratio |       | Synonymous SNVs | Nonsynonymous SNVs | Synonymous/ Nonsynonymous Ratio | Missense SNVs | Nonsense SNVs | Nonstop SNVs | Misstart SNVs | Splice SNVs | Frameshift Insertion | Frameshift Deletion | Frameshift Substitution |
|------------------------------|------------|-----------------------------------|----------------------------------|---------------------|----------------------------|--------------|--------------|--------------|-------------|---------------------------|--------------|--------------|--------------|-------|-------------------------------|-------|-----------------|--------------------|---------------------------------|---------------|---------------|--------------|---------------|-------------|----------------------|---------------------|-------------------------|
|                              |            |                                   |                                  |                     | At least 10x               | At least 20x | At least 30x | At least 40x | At least 5x | At least 10x              | At least 20x | At least 30x | At least 40x | G:G+C | C:A+T                         |       |                 |                    |                                 |               |               |              |               |             |                      |                     |                         |
| <b>Median of All Samples</b> |            |                                   |                                  |                     |                            |              |              |              |             |                           |              |              |              |       |                               |       |                 |                    |                                 |               |               |              |               |             |                      |                     |                         |
| BRCA2.1                      | MALE       | 96.9                              | 98.1                             | 156.685             | 99.3                       | 98.4         | 92.8         | 80.3         | 61.5        | 99.5                      | 98.7         | 94.3         | 84           | 66.2  | 2.144                         | 3.097 | 10394           | 9529               | 1.11                            | 9380          | 73            | 11           | 19            | 73          | 67                   | 72                  | 20                      |
| BRCA2.2                      | FEMALE     | 96.7                              | 98.3                             | 159.414             | 99.4                       | 98.5         | 93.9         | 82.7         | 63.2        | 99.6                      | 99           | 95.4         | 86.2         | 69.3  | 2.141                         | 3.053 | 10292           | 9480               | 1.09                            | 9368          | 83            | 10           | 19            | 64          | 76                   | 61                  | 18                      |
| BRCA2.3                      | FEMALE     | 96.7                              | 98.1                             | 156.822             | 99.4                       | 98.5         | 94.1         | 83.1         | 63.1        | 99.6                      | 98.9         | 94.8         | 85           | 67    | 2.141                         | 3.054 | 10429           | 9661               | 1.08                            | 9564          | 72            | 11           | 14            | 80          | 68                   | 62                  | 16                      |
| BRCA2.4                      | FEMALE     | 96.7                              | 98.2                             | 155.886             | 99.4                       | 98.5         | 93.8         | 82.2         | 61.4        | 99.6                      | 99           | 95.3         | 85.9         | 68.3  | 2.143                         | 3.088 | 10340           | 9461               | 1.09                            | 9351          | 80            | 9            | 21            | 61          | 66                   | 73                  | 15                      |
| BRCA2.5                      | FEMALE     | 96.7                              | 98.3                             | 156.927             | 99.4                       | 98.5         | 93.9         | 82.9         | 61.2        | 99.6                      | 99           | 95.6         | 85.9         | 68.4  | 2.143                         | 3.015 | 10528           | 9479               | 1.09                            | 9457          | 70            | 10           | 17            | 70          | 67                   | 83                  | 17                      |
| BRCA2.6                      | FEMALE     | 96.7                              | 98.5                             | 156.918             | 99.4                       | 98.5         | 94.1         | 83.1         | 63.2        | 99.6                      | 98.9         | 95.2         | 85.9         | 68.4  | 2.144                         | 3.092 | 11941           | 10723              | 1.11                            | 10618         | 73            | 14           | 18            | 73          | 68                   | 68                  | 16                      |
| BRCA2.7                      | FEMALE     | 96.8                              | 98.1                             | 158.226             | 99.4                       | 98.6         | 94.3         | 83.6         | 63.7        | 99.6                      | 98.8         | 94.6         | 84.5         | 66.2  | 2.145                         | 3.088 | 10346           | 9565               | 1.08                            | 9488          | 71            | 10           | 16            | 85          | 68                   | 78                  | 23                      |
| BRCA2.9                      | FEMALE     | 96.7                              | 98.2                             | 156.434             | 99.4                       | 98.5         | 93.9         | 82.3         | 61.8        | 99.6                      | 98.9         | 95           | 85.1         | 66.8  | 2.142                         | 3.048 | 10390           | 9450               | 1.1                             | 9345          | 70            | 10           | 18            | 70          | 64                   | 69                  | 21                      |
| BRCA2.11                     | FEMALE     | 96.7                              | 98.3                             | 155.083             | 99.4                       | 98.5         | 93.8         | 82.3         | 61          | 99.6                      | 98.9         | 95.2         | 85.6         | 67.6  | 2.144                         | 3.045 | 10405           | 9502               | 1.08                            | 9485          | 74            | 10           | 15            | 75          | 71                   | 61                  | 26                      |
| BRCA2.12                     | FEMALE     | 96.8                              | 98.2                             | 158.378             | 99.4                       | 98.5         | 93.9         | 82.8         | 63.2        | 99.6                      | 98.9         | 95           | 85.3         | 67.7  | 2.138                         | 3.024 | 10344           | 9478               | 1.09                            | 9385          | 64            | 13           | 16            | 76          | 76                   | 70                  | 21                      |
| BRCA2.13                     | FEMALE     | 96.8                              | 98.1                             | 158.198             | 99.4                       | 98.5         | 94.2         | 83.3         | 63.4        | 99.6                      | 98.9         | 95.1         | 85.5         | 67.7  | 2.14                          | 3.029 | 10379           | 9433               | 1.1                             | 9317          | 81            | 15           | 20            | 80          | 70                   | 70                  | 21                      |
| BRCA2.14                     | FEMALE     | 96.9                              | 98.1                             | 158.532             | 99.4                       | 98.6         | 94.3         | 83.7         | 64.1        | 99.6                      | 98.8         | 94.7         | 84           | 66.4  | 2.138                         | 3.06  | 10437           | 9522               | 1.09                            | 9439          | 77            | 13           | 23            | 73          | 70                   | 62                  | 18                      |
| BRCA2.15                     | MALE       | 97                                | 98.2                             | 158.185             | 99.3                       | 98.4         | 92.9         | 80.6         | 61.5        | 99.6                      | 98.9         | 95.2         | 85.9         | 68.5  | 2.137                         | 3.067 | 10398           | 9491               | 1.1                             | 9392          | 65            | 14           | 20            | 74          | 68                   | 74                  | 14                      |
| BRCA2.16                     | FEMALE     | 96.7                              | 98.2                             | 159.542             | 99.3                       | 98.5         | 93.8         | 82.6         | 62.9        | 99.6                      | 98.9         | 95.3         | 85.9         | 68.2  | 2.14                          | 3.089 | 10568           | 9645               | 1.11                            | 9446          | 66            | 12           | 21            | 76          | 71                   | 81                  | 22                      |
| BRCA2.17                     | FEMALE     | 96.8                              | 98.3                             | 159.482             | 99.4                       | 98.5         | 94.1         | 82.9         | 62.9        | 99.6                      | 99           | 95.4         | 86.1         | 68.8  | 2.141                         | 3.088 | 10404           | 9678               | 1.08                            | 9567          | 78            | 13           | 20            | 65          | 71                   | 74                  | 27                      |
| BRCA2.18                     | FEMALE     | 96.5                              | 98.1                             | 154.597             | 99.3                       | 98.4         | 93.4         | 81.2         | 59.9        | 99.6                      | 98.9         | 94.5         | 84.4         | 65.3  | 2.14                          | 3.053 | 10504           | 9593               | 1.09                            | 9471          | 85            | 15           | 22            | 72          | 66                   | 74                  | 17                      |
| BRCA2.19                     | FEMALE     | 96.8                              | 98.1                             | 158.908             | 99.4                       | 98.6         | 94.3         | 83.5         | 63.8        | 99.6                      | 98.9         | 94.9         | 85.1         | 67    | 2.138                         | 3.056 | 10317           | 9551               | 1.08                            | 9452          | 72            | 10           | 17            | 63          | 73                   | 83                  | 24                      |
| BRCA2.21                     | FEMALE     | 96.8                              | 98.2                             | 159.693             | 99.4                       | 98.6         | 94.3         | 83.7         | 64.1        | 99.6                      | 98.9         | 95.2         | 85.7         | 68    | 2.14                          | 3.076 | 10466           | 9629               | 1.09                            | 9524          | 72            | 13           | 20            | 69          | 64                   | 77                  | 24                      |
| BRCA2.22                     | FEMALE     | 96.8                              | 98.1                             | 159.249             | 99.4                       | 98.5         | 94.2         | 83.5         | 63.8        | 99.6                      | 98.8         | 94.8         | 85           | 67    | 2.139                         | 3.093 | 10305           | 9436               | 1.09                            | 9333          | 75            | 12           | 16            | 68          | 64                   | 72                  | 22                      |
| BRCA2.23                     | FEMALE     | 96.7                              | 98.2                             | 157.275             | 99.3                       | 98.4         | 93.6         | 81.9         | 61.2        | 99.5                      | 98.7         | 94.4         | 83.9         | 65.4  | 2.14                          | 3.032 | 10469           | 9490               | 1.1                             | 9383          | 79            | 10           | 18            | 77          | 76                   | 60                  | 24                      |
| BRCA2.24                     | FEMALE     | 96.7                              | 98.2                             | 158.684             | 99.4                       | 98.5         | 94           | 82.8         | 62.6        | 99.6                      | 99           | 95.4         | 86.3         | 68.9  | 2.143                         | 3.06  | 12178           | 10857              | 1.12                            | 10743         | 76            | 17           | 21            | 88          | 65                   | 73                  | 16                      |
| BRCA2.25                     | FEMALE     | 96.7                              | 98.1                             | 157.898             | 99.4                       | 98.5         | 94           | 83           | 63.3        | 99.6                      | 98.8         | 94.6         | 84.8         | 67    | 2.142                         | 3.076 | 10304           | 9464               | 1.09                            | 9371          | 66            | 9            | 18            | 72          | 73                   | 62                  | 25                      |
| BRCA2.26                     | FEMALE     | 96.8                              | 98.3                             | 160.529             | 99.4                       | 98.6         | 94.4         | 83.9         | 64.6        | 99.6                      | 99           | 95.6         | 86.9         | 70.3  | 2.14                          | 3.045 | 10445           | 9647               | 1.08                            | 9542          | 76            | 10           | 19            | 74          | 65                   | 78                  | 23                      |
| BRCA2.27                     | FEMALE     | 96.7                              | 98.2                             | 156.329             | 99.4                       | 98.5         | 94           | 82.8         | 62.5        | 99.5                      | 98.7         | 94.2         | 83.8         | 64.8  | 2.142                         | 3.112 | 10386           | 9465               | 1.1                             | 9348          | 84            | 12           | 21            | 76          | 73                   | 54                  | 14                      |
| BRCA2.28                     | FEMALE     | 96.8                              | 98                               | 157.925             | 99.4                       | 98.6         | 94.2         | 83.4         | 63.6        | 99.6                      | 98.7         | 94.6         | 84.8         | 66.8  | 2.14                          | 3.058 | 10328           | 9529               | 1.08                            | 9418          | 79            | 11           | 21            | 76          | 69                   | 58                  | 25                      |
| BRCA2.29                     | FEMALE     | 96.6                              | 98.1                             | 153.481             | 99.3                       | 98.4         | 93.4         | 81.2         | 60.2        | 99.6                      | 98.8         | 94.6         | 84.5         | 66.2  | 2.144                         | 3.028 | 10397           | 9448               | 1.1                             | 9343          | 77            | 10           | 18            | 78          | 65                   | 73                  | 18                      |
| BRCA2.31                     | FEMALE     | 96.8                              | 98.4                             | 160.358             | 99.4                       | 98.6         | 94.5         | 84.3         | 65.4        | 99.6                      | 98.7         | 94.6         | 84.9         | 67.3  | 2.139                         | 3.082 | 10375           | 9379               | 1.11                            | 9277          | 66            | 15           | 21            | 65          | 68                   | 63                  | 22                      |
| BRCA2.34                     | FEMALE     | 96.8                              | 98.2                             | 158.740             | 99.4                       | 98.5         | 94.1         | 83.2         | 63.9        | 99.6                      | 98.8         | 94.7         | 84.9         | 68    | 2.137                         | 3.09  | 10444           | 9626               | 1.08                            | 9521          | 78            | 11           | 18            | 70          | 57                   | 88                  | 19                      |
| BRCA2.35                     | FEMALE     | 96.7                              | 98.1                             | 157.83              | 99.4                       | 98.5         | 93.9         | 82.8         | 62.8        | 99.6                      | 98.9         | 95           | 85.6         | 68.4  | 2.142                         | 3.026 | 10470           | 9574               | 1.09                            | 9455          | 78            | 8            | 23            | 84          | 77                   | 68                  | 18                      |
| BRCA2.36                     | FEMALE     | 96.2                              | 97.6                             | 141.098             | 99.3                       | 98.2         | 91.6         | 75.2         | 49.5        | 99.5                      | 98.5         | 92.6         | 78.4         | 54.8  | 2.147                         | 3.074 | 10197           | 9343               | 1.09                            | 9260          | 66            | 11           | 16            | 75          | 68                   | 62                  | 19                      |
| BRCA2.37                     | FEMALE     | 96.2                              | 97.6                             | 157.063             | 99.4                       | 98.5         | 92.6         | 82.5         | 62.6        | 99.6                      | 98.9         | 95           | 85.4         | 67.7  | 2.14                          | 3.046 | 10345           | 9465               | 1.09                            | 9386          | 74            | 9            | 22            | 65          | 65                   | 77                  | 17                      |
| BRCA2.38                     | FEMALE     | 96.7                              | 98.2                             | 156.646             | 99.4                       | 98.5         | 93.8         | 82.1         | 61.6        | 99.6                      | 98.9         | 95.2         | 85.7         | 67.9  | 2.144                         | 3.063 | 10474           | 9577               | 1.09                            | 9464          | 78            | 13           | 22            | 71          | 66                   | 67                  | 10                      |
| BRCA2.39                     | FEMALE     | 96.8                              | 98.2                             | 158.982             | 99.4                       | 98.5         | 94.3         | 83.6         | 64.2        | 99.6                      | 98.8         | 94.9         | 85.4         | 67.7  | 2.144                         | 3.04  | 10283           | 9495               | 1.08                            | 9391          | 74            | 12           | 18            | 66          | 67                   | 15                  |                         |
| BRCA2.40                     | FEMALE     | 96.7                              | 98.1                             | 153.088             | 99.3                       | 98.4         | 93.6         | 81.5         | 60.3        | 99.6                      | 98.8         | 94.5         | 84           | 64.9  | 2.142                         | 3.058 | 10362           | 9689               | 1.07                            | 9588          | 75            | 12           | 14            | 68          | 79                   | 66                  | 18                      |
| BRCA2.41                     | FEMALE     | 96.7                              | 98.1                             | 155.852             | 99.4                       | 98.5         | 92.3         | 82.3         | 61.7        | 99.6                      | 98.8         | 94.7         | 84.7         | 65.2  | 2.141                         | 3.111 | 10278           | 9501               | 1.08                            | 9394          | 79            | 9            | 18            | 65          | 63                   | 65                  | 15                      |
| BRCA2.42                     | MALE       | 96.9                              | 98.2                             | 155.653             | 99.3                       | 98.2         | 92.2         | 79.2         | 59.3        | 99.6                      | 98.9         | 95.2         | 85.9         | 68.7  | 2.142                         | 3.071 | 10391           | 9630               | 1.08                            | 9519          | 80            | 10           | 21            | 74          | 66                   | 64                  | 22                      |
| BRCA2.43                     | FEMALE     | 96.8                              | 98.4                             | 160.205             | 99.4                       | 98.5         | 94.2         | 83.4         | 64.2        | 99.7                      | 99.1         | 96.1         | 88           | 72.5  | 2.144                         | 3.063 | 10352           | 9465               | 1.09                            | 9365          | 68            | 10           | 22            | 72          | 63                   | 66                  | 12                      |
| BRCA2.44                     | FEMALE     | 96.8                              | 98.2                             | 159.832             | 99.4                       | 98.5         | 94.1         | 83.2         | 64          | 99.6                      | 98.9         | 94.9         | 85.3         | 67.9  | 2.139                         | 3.126 | 10500           | 9488               | 1.11                            | 9393          | 70            | 9            | 16            | 78          | 61                   | 74                  | 20                      |
| BRCA2.46                     | FEMALE     | 96.7                              | 98.2                             | 156.576             | 99.4                       | 98.5         | 94.1         | 82.8         | 62.5        | 99.6                      | 98.8         | 94.5         | 84.1         | 68.9  | 2.145                         | 3.064 | 10565           | 9664               | 1.09                            | 9568          | 85            | 8            | 13            | 68          | 61                   | 63                  | 19                      |
| BRCA2.49                     | FEMALE     | 96.7                              | 98.1                             | 158.049             | 99.4                       | 98.5         | 94           | 83           | 63.1        | 99.6                      | 98.8         | 94.8         | 85.2         | 67.6  | 2.139                         | 3.081 | 10520           | 9631               | 1.09                            | 9525          | 75            | 11           | 20            | 80          | 62                   | 73                  | 11                      |
| BRCA2.50                     | FEMALE     | 96.8                              | 98.2                             | 157.512             | 99.4                       | 98.5         | 94.2         | 83.3         | 63.7        | 99.6                      | 98.8         | 95           | 85.6         | 68.1  | 2.143                         | 3.072 | 10338           | 9585               | 1.08                            | 9488          | 67            | 10           | 20            | 72          | 66                   | 78                  | 18                      |
| BRCA2.51                     | FEMALE     | 96.8                              | 98                               | 157.003             | 99.4                       | 98.6         | 94.2         | 83.3         | 63.4        | 99.5                      | 98.7         | 94.3         | 83.9         | 65.2  | 2.141                         | 3.057 | 10422           | 9676               | 1.08                            | 9570          | 78            | 11           | 17            | 79          | 70                   | 67                  | 17                      |
| BRCA2.52                     | FEMALE     | 96.8                              | 98.2                             | 160.348             | 99.4                       | 98.6         | 94.3         | 83.7         | 64.4        | 99.6                      | 98.9         | 95.3         | 86           | 69    | 2.143                         | 3.056 | 10366           | 9632               | 1.07                            | 9630          | 72            | 9            | 21            | 71          | 78                   | 65                  | 28                      |
| BRCA2.53                     | FEMALE     | 96.8                              |                                  |                     |                            |              |              |              |             |                           |              |              |              |       |                               |       |                 |                    |                                 |               |               |              |               |             |                      |                     |                         |

Table S1 continued

| Sample_ID                    | CGI_Gender | Percent of Genome Fully Sequenced | Percent of Exome Fully Sequenced | Total Sequence (Gb) | Percent of Genome Coverage |              |              |              |              | Percent of Exome Coverage |              |              |              |              | Transition/Transversion Ratio |              | Synonymous SNVs | Nonsynonymous SNVs | Synonymous/ Nonsynonymous Ratio | Missense SNVs | Nonsense SNVs | Nonstop SNVs | Misstart SNVs | Splice Sites | Frameshift Insertion | Frameshift Deletion | Frameshift Substitution |           |
|------------------------------|------------|-----------------------------------|----------------------------------|---------------------|----------------------------|--------------|--------------|--------------|--------------|---------------------------|--------------|--------------|--------------|--------------|-------------------------------|--------------|-----------------|--------------------|---------------------------------|---------------|---------------|--------------|---------------|--------------|----------------------|---------------------|-------------------------|-----------|
|                              |            |                                   |                                  |                     | At least 5x                | At least 10x | At least 20x | At least 30x | At least 40x | At least 5x               | At least 10x | At least 20x | At least 30x | At least 40x | Genome                        | Exome        |                 |                    |                                 |               |               |              |               |              |                      |                     |                         |           |
| <b>Median of All Samples</b> |            |                                   |                                  | <b>161.984</b>      | <b>98.3</b>                | <b>98.1</b>  | <b>92.15</b> | <b>78.85</b> | <b>59.3</b>  | <b>99.5</b>               | <b>98.5</b>  | <b>93.5</b>  | <b>83.5</b>  | <b>63.5</b>  | <b>2.143</b>                  | <b>3.011</b> | <b>10391.5</b>  | <b>8533</b>        | <b>1.216</b>                    | <b>8433</b>   | <b>72.5</b>   | <b>11</b>    | <b>22</b>     | <b>18</b>    | <b>72.5</b>          | <b>65.5</b>         | <b>72</b>               | <b>20</b> |
| UTSW1                        | FEMALE     | 97.4                              | 98.7                             | 301.95              | 99.5                       | 99           | 97.2         | 93.7         | 88           | 99.7                      | 99.4         | 98.3         | 96           | 91.9         | 2.134                         | 3.001        | 10566           | 9769               | 1.08                            | 9632          | 79            | 16           | 22            | 88           | 82                   | 72                  | 22                      |           |
| UTSW2                        | FEMALE     | 96.4                              | 97.7                             | 160.39              | 99.3                       | 98.1         | 91.9         | 78.2         | 57.9         | 99.5                      | 98.3         | 92.5         | 79.5         | 59.9         | 2.143                         | 3.028        | 10510           | 9641               | 1.09                            | 9538          | 70            | 12           | 21            | 82           | 76                   | 80                  | 18                      |           |
| UTSW3                        | MALE       | 96.4                              | 97.7                             | 154.902             | 99.2                       | 98.5         | 90           | 74.6         | 53.8         | 99.5                      | 98.4         | 92.7         | 79.8         | 59.7         | 2.143                         | 3.083        | 10466           | 9472               | 1.1                             | 9368          | 69            | 11           | 24            | 78           | 66                   | 71                  | 23                      |           |
| UTSW4                        | MALE       | 97                                | 98                               | 164.695             | 99.3                       | 98.3         | 92.7         | 80.6         | 62.5         | 99.5                      | 98.6         | 94.2         | 84.1         | 68.8         | 2.139                         | 3.101        | 10789           | 9925               | 1.09                            | 9823          | 75            | 10           | 17            | 84           | 68                   | 76                  | 17                      |           |
| UTSW5                        | FEMALE     | 96.3                              | 97.7                             | 157.654             | 99.2                       | 98.4         | 91.4         | 76.4         | 56.4         | 99.5                      | 98.4         | 92.4         | 79.1         | 60.4         | 2.144                         | 3.032        | 10444           | 9424               | 1.09                            | 9444          | 72            | 14           | 17            | 84           | 67                   | 66                  | 24                      |           |
| UTSW6                        | MALE       | 96.7                              | 98                               | 163.02              | 99.2                       | 97.9         | 91.1         | 77.3         | 58.2         | 99.5                      | 98.6         | 94           | 83.2         | 65.4         | 2.142                         | 3.083        | 10644           | 9674               | 1.1                             | 9591          | 55            | 12           | 16            | 76           | 69                   | 86                  | 23                      |           |
| UTSW7                        | FEMALE     | 96.6                              | 97.9                             | 168.507             | 99.3                       | 98.1         | 92.4         | 80.1         | 61.8         | 99.5                      | 98.5         | 93.9         | 83.4         | 67.4         | 2.143                         | 3.07         | 10449           | 9655               | 1.09                            | 9466          | 68            | 13           | 18            | 76           | 73                   | 66                  | 22                      |           |
| UTSW8                        | MALE       | 96.6                              | 97.8                             | 156.15              | 99.2                       | 98.2         | 91.2         | 78.5         | 60.3         | 99.5                      | 98.5         | 93.1         | 80.1         | 64.8         | 2.144                         | 3.054        | 10584           | 9635               | 1.08                            | 9635          | 65            | 9            | 15            | 85           | 63                   | 72                  | 17                      |           |
| UTSW9                        | FEMALE     | 96.5                              | 97.5                             | 158.223             | 99.3                       | 98.1         | 92.2         | 78.8         | 57.9         | 99.4                      | 98.3         | 92.5         | 79.4         | 59           | 2.143                         | 3.052        | 10287           | 9313               | 1.1                             | 9221          | 67            | 10           | 15            | 67           | 72                   | 70                  | 18                      |           |
| UTSW10                       | FEMALE     | 96.5                              | 97.9                             | 163.649             | 99.3                       | 98.2         | 92.5         | 79.7         | 60.1         | 99.5                      | 98.5         | 93.3         | 81.3         | 62.6         | 2.141                         | 3.046        | 10392           | 9551               | 1.09                            | 9439          | 77            | 15           | 20            | 76           | 71                   | 72                  | 24                      |           |
| UTSW11                       | FEMALE     | 96.5                              | 98                               | 161.501             | 99.3                       | 98.1         | 92.1         | 78.7         | 58.5         | 99.5                      | 98.6         | 93.7         | 81.8         | 63.3         | 2.143                         | 3.113        | 10364           | 9315               | 1.11                            | 9218          | 68            | 11           | 18            | 70           | 60                   | 64                  | 22                      |           |
| UTSW12                       | FEMALE     | 96.4                              | 97.7                             | 155.906             | 99.2                       | 98           | 91.7         | 77.6         | 55.2         | 99.5                      | 98.4         | 92.7         | 79.3         | 58.9         | 2.142                         | 3.026        | 10255           | 9514               | 1.08                            | 9409          | 75            | 11           | 16            | 65           | 59                   | 68                  | 21                      |           |
| UTSW13                       | FEMALE     | 96.5                              | 97.9                             | 160.164             | 99.3                       | 98.1         | 92.2         | 78.9         | 58.7         | 99.5                      | 98.5         | 93.3         | 80.9         | 61.6         | 2.145                         | 3.103        | 10891           | 9828               | 1.11                            | 9712          | 88            | 11           | 17            | 82           | 72                   | 57                  | 27                      |           |
| UTSW14                       | FEMALE     | 96.2                              | 97.6                             | 157.478             | 99.2                       | 98           | 91.3         | 76.9         | 59.5         | 99.5                      | 98.4         | 92.8         | 80           | 60.5         | 2.142                         | 3.064        | 10214           | 9444               | 1.08                            | 9341          | 71            | 11           | 21            | 69           | 61                   | 57                  | 17                      |           |
| UTSW15                       | FEMALE     | 96                                | 97.8                             | 160.906             | 99.2                       | 97.8         | 90.9         | 76.5         | 56.2         | 99.5                      | 98.5         | 93.4         | 81.7         | 63.1         | 2.151                         | 3.106        | 10299           | 9584               | 1.07                            | 9482          | 73            | 12           | 17            | 65           | 73                   | 79                  | 20                      |           |
| UTSW16                       | MALE       | 96.7                              | 97.7                             | 161.752             | 99.2                       | 98           | 91.5         | 78.3         | 59.3         | 99.5                      | 98.4         | 93.4         | 82.1         | 63.7         | 2.142                         | 3.094        | 10488           | 9529               | 1.1                             | 9413          | 85            | 9            | 22            | 79           | 60                   | 74                  | 22                      |           |
| UTSW17                       | FEMALE     | 96.5                              | 97.9                             | 162.933             | 99.3                       | 98.1         | 92.3         | 79.2         | 59.3         | 99.5                      | 98.5         | 93.4         | 81.4         | 62.5         | 2.148                         | 3.101        | 10416           | 9498               | 1.1                             | 9406          | 63            | 9            | 20            | 66           | 71                   | 67                  | 16                      |           |
| UTSW18                       | FEMALE     | 96.5                              | 98                               | 163.081             | 99.3                       | 98.1         | 92.2         | 79.1         | 59.3         | 99.5                      | 98.6         | 93.7         | 82.1         | 63.9         | 2.141                         | 3.085        | 10294           | 9530               | 1.08                            | 9427          | 75            | 10           | 18            | 67           | 68                   | 71                  | 18                      |           |
| UTSW19                       | FEMALE     | 96.4                              | 97.9                             | 159.446             | 99.2                       | 98           | 91.7         | 77.8         | 57.3         | 99.5                      | 98.6         | 93.6         | 81.7         | 63           | 2.143                         | 3.042        | 10237           | 9538               | 1.07                            | 9444          | 65            | 12           | 17            | 75           | 69                   | 76                  | 14                      |           |
| UTSW20                       | FEMALE     | 96.5                              | 98.1                             | 162.254             | 99.3                       | 98.1         | 92.3         | 79.5         | 59.9         | 99.6                      | 98.7         | 94.3         | 83.5         | 65.9         | 2.145                         | 3.022        | 10333           | 9551               | 1.08                            | 9449          | 76            | 8            | 18            | 68           | 70                   | 74                  | 23                      |           |
| UTSW21                       | FEMALE     | 96.3                              | 97.6                             | 154.033             | 99.2                       | 97.9         | 90.8         | 75.5         | 53.8         | 99.5                      | 98.3         | 92.3         | 78.5         | 58.1         | 2.145                         | 3.083        | 10388           | 9464               | 1.1                             | 9343          | 79            | 18           | 24            | 70           | 60                   | 69                  | 12                      |           |
| UTSW22                       | FEMALE     | 96.6                              | 98                               | 179.191             | 99.3                       | 98.2         | 93.2         | 82.5         | 66.1         | 99.5                      | 98.6         | 94.5         | 85.3         | 70.8         | 2.143                         | 3.125        | 10396           | 9543               | 1.09                            | 9444          | 71            | 10           | 18            | 71           | 66                   | 67                  | 19                      |           |
| UTSW23                       | MALE       | 96.6                              | 97.9                             | 157.824             | 99.2                       | 97.8         | 90.2         | 75.2         | 55.1         | 99.5                      | 98.5         | 93.3         | 81.2         | 62.1         | 2.144                         | 3.047        | 10267           | 9486               | 1.08                            | 9362          | 74            | 12           | 18            | 70           | 66                   | 80                  | 20                      |           |
| UTSW24                       | MALE       | 96.4                              | 97.7                             | 159.071             | 99.3                       | 98           | 91.7         | 77.9         | 57.3         | 99.5                      | 98.3         | 92.3         | 78.9         | 58.8         | 2.143                         | 3.058        | 10360           | 9477               | 1.1                             | 9338          | 60            | 10           | 19            | 70           | 62                   | 70                  | 17                      |           |
| UTSW25                       | MALE       | 96.6                              | 97.7                             | 159.167             | 99.2                       | 97.9         | 90.6         | 76.1         | 56.5         | 99.5                      | 98.5         | 93.3         | 81.4         | 62.7         | 2.141                         | 3.079        | 10803           | 9748               | 1.11                            | 9641          | 73            | 13           | 21            | 79           | 56                   | 82                  | 18                      |           |
| UTSW26                       | FEMALE     | 96.4                              | 97.7                             | 162.341             | 99.3                       | 98.1         | 92.2         | 79.2         | 59.4         | 99.5                      | 98.5         | 93.2         | 81.2         | 62.4         | 2.145                         | 3.031        | 10602           | 9633               | 1.1                             | 9532          | 72            | 12           | 17            | 72           | 66                   | 63                  | 19                      |           |
| UTSW27                       | FEMALE     | 96.4                              | 97.9                             | 160.75              | 99.3                       | 98.1         | 92.2         | 79.1         | 59.4         | 99.5                      | 98.6         | 93.8         | 82.1         | 64           | 2.146                         | 3.015        | 10308           | 9450               | 1.09                            | 9367          | 66            | 9            | 18            | 76           | 68                   | 72                  | 15                      |           |
| UTSW28                       | FEMALE     | 96.5                              | 98.1                             | 159.013             | 99.3                       | 98.1         | 92.3         | 78.6         | 58.3         | 99.5                      | 98.4         | 92.9         | 80.2         | 60.7         | 2.144                         | 3.055        | 10510           | 9574               | 1.09                            | 9457          | 67            | 10           | 17            | 69           | 65                   | 74                  | 24                      |           |
| UTSW30                       | MALE       | 96.6                              | 97.8                             | 159.214             | 99.2                       | 97.8         | 90.2         | 75.4         | 55.7         | 99.5                      | 98.4         | 93           | 80.2         | 62           | 2.142                         | 3.097        | 10353           | 9447               | 1.1                             | 9345          | 72            | 9            | 21            | 65           | 82                   | 74                  | 22                      |           |
| UTSW31                       | MALE       | 96.5                              | 97.6                             | 160.569             | 99.2                       | 97.9         | 90.6         | 76.1         | 56.5         | 99.5                      | 98.5         | 93.3         | 81.5         | 63.1         | 2.144                         | 3.164        | 12844           | 11370              | 1.13                            | 11244         | 92            | 15           | 19            | 94           | 62                   | 76                  | 22                      |           |
| UTSW32                       | MALE       | 96.5                              | 97.8                             | 160.628             | 99.2                       | 97.8         | 90.4         | 76.1         | 56.8         | 99.5                      | 98.5         | 93.2         | 81.5         | 64.3         | 2.145                         | 3.023        | 10465           | 9523               | 1.08                            | 9455          | 62            | 10           | 16            | 68           | 65                   | 69                  | 15                      |           |
| UTSW33                       | MALE       | 96.6                              | 97.7                             | 160.746             | 99.2                       | 97.8         | 90.6         | 76.3         | 57           | 99.5                      | 98.5         | 93.3         | 81.6         | 63.2         | 2.144                         | 3.043        | 10491           | 9656               | 1.09                            | 9561          | 67            | 10           | 18            | 67           | 69                   | 66                  | 23                      |           |
| UTSW34                       | MALE       | 96.6                              | 97.7                             | 158.695             | 99.2                       | 97.8         | 90.4         | 75.7         | 55.6         | 99.5                      | 98.4         | 92.9         | 80.3         | 61           | 2.143                         | 3.117        | 10127           | 9308               | 1.09                            | 9201          | 76            | 11           | 20            | 75           | 69                   | 67                  | 23                      |           |
| UTSW35                       | FEMALE     | 96.4                              | 97.5                             | 157.09              | 99.3                       | 98.1         | 92           | 78           | 56.7         | 99.4                      | 98.2         | 92           | 78           | 56.9         | 2.141                         | 3.142        | 10700           | 9829               | 1.09                            | 9712          | 88            | 10           | 19            | 84           | 64                   | 72                  | 29                      |           |
| UTSW36                       | FEMALE     | 96.3                              | 97.8                             | 162.38              | 99.3                       | 98.1         | 92.2         | 79.1         | 59.4         | 99.5                      | 98.6         | 93.7         | 82.2         | 64.1         | 2.145                         | 3.116        | 11676           | 11496              | 1.1                             | 11376         | 81            | 12           | 25            | 99           | 64                   | 96                  | 19                      |           |
| UTSW37                       | FEMALE     | 96.4                              | 97.9                             | 162.036             | 99.3                       | 98.1         | 92.2         | 79           | 59           | 99.6                      | 98.7         | 94.1         | 82.8         | 64.6         | 2.146                         | 3.158        | 10737           | 9861               | 1.11                            | 9563          | 71            | 10           | 17            | 74           | 69                   | 64                  | 14                      |           |
| UTSW38                       | MALE       | 96.9                              | 97.9                             | 163.394             | 99.2                       | 97.9         | 90.9         | 77.2         | 58.2         | 99.5                      | 98.6         | 93.9         | 82.9         | 65.4         | 2.141                         | 3.117        | 10580           | 9737               | 1.09                            | 9640          | 70            | 11           | 16            | 74           | 67                   | 74                  | 20                      |           |
| UTSW39                       | FEMALE     | 96.4                              | 97.4                             | 156.244             | 99.3                       | 98.1         | 91.7         | 77.2         | 55.6         | 99.4                      | 98.2         | 91.8         | 77.6         | 55.5         | 2.145                         | 3.11         | 10284           | 9416               | 1.09                            | 9329          | 65            | 9            | 13            | 67           | 74                   | 85                  | 22                      |           |
| UTSW40                       | FEMALE     | 96.4                              | 97.4                             | 157.333             | 99.3                       | 98.1         | 91.9         | 77.9         | 56.8         | 99.4                      | 98.1         | 91.9         | 77.9         | 57.1         | 2.141                         | 3.067        | 10337           | 9422               | 1.1                             | 9337          | 61            | 9            | 19            | 75           | 66                   | 81                  | 13                      |           |
| UTSW41                       | MALE       | 96.5                              | 97.6                             | 151.739             | 99.2                       | 97.6         | 89.1         | 72.5         | 51           | 99.5                      | 98.4         | 92.5         | 78.9         | 58.6         | 2.143                         | 3.021        | 10230           | 9536               | 1.07                            | 9434          | 75            | 9            | 18            | 64           | 66                   | 66                  | 23                      |           |
| UTSW42                       | FEMALE     | 96                                | 97.3                             | 147.802             | 99.2                       | 97.8         | 90.1         | 73.5         | 50.1         | 99.4                      | 98.1         | 91.2         | 75.7         | 53.2         | 2.148                         | 3.11         | 13022           | 11469              | 1.14                            | 11357         | 77            | 12           | 23            | 96           | 65                   | 92                  | 15                      |           |
| UTSW43                       | FEMALE     | 96.3                              | 97.8                             | 155.121             | 99.2                       | 98           | 91.2         | 76.3         | 54.7         | 99.5                      | 98.6         | 93.1         | 80.1         | 60.3         | 2.145                         | 3.089        | 10416           | 9590               | 1.09                            | 9489          | 69            | 11           | 21            | 72           | 66                   | 70                  | 19                      |           |

**Table S2. BRCA1-population cancer history (n=88)**

| Patient  | BRCA1-variant*    | Cancer History**            | Gender | Patient  | BRCA1-variant*    | Cancer History**               | Gender |
|----------|-------------------|-----------------------------|--------|----------|-------------------|--------------------------------|--------|
| BRCA1.1  | 2800delAA         | Breast-39                   | F      | BRCA1.50 | 2800delAA         | Breast-40                      | F      |
| BRCA1.2  | 300T>G            | Unaffected-53               | F      | BRCA1.52 | 1135insA          | Ovarian-58                     | F      |
| BRCA1.3  | 5536delC          | Breast-54                   | F      | BRCA1.53 | 5382insC          | Breast-60; Esophagus-62        | F      |
| BRCA1.4  | 3937C>T           | Unaffected-32               | F      | BRCA1.55 | 4987C>G           | Breast-47                      | F      |
| BRCA1.5  | 4962del15         | Unaffected-24               | F      | BRCA1.56 | IVS13+1G>A        | Breast-41                      | F      |
| BRCA1.6  | 5187A>T           | Breast-27                   | F      | BRCA1.57 | 5382insC          | Unaffected-61                  | M      |
| BRCA1.7  | IVS20+1G>A        | Unaffected-61               | M      | BRCA1.58 | 300T>G            | Breast-35                      | F      |
| BRCA1.8  | del exons 1-2     | Breast-31                   | F      | BRCA1.59 | 1294del40         | Breast-40; Thyroid-36; Skin-34 | F      |
| BRCA1.9  | 2925del4          | Breast-37                   | F      | BRCA1.60 | 5382insC          | Breast-47,49                   | F      |
| BRCA1.10 | 3889delAG         | Breast-68                   | F      | BRCA1.61 | IVS12+22del21insA | Unaffected-24                  | F      |
| BRCA1.11 | 2798del4          | Unaffected-44               | M      | BRCA1.62 | exon 13 ins 6KB   | Breast-38                      | F      |
| BRCA1.12 | 3987A>T           | Breast-38                   | F      | BRCA1.63 | 2798del4          | Breast-46; Peritoneum-50       | F      |
| BRCA1.13 | 2576delC          | Unaffected-43               | F      | BRCA1.64 | IV5S5-11T>G       | Breast-34,59                   | F      |
| BRCA1.15 | del exons 9-12    | Unaffected-19               | F      | BRCA1.65 | 300T>G            | Bladder-70                     | M      |
| BRCA1.16 | 3600del11         | Breast-38                   | F      | BRCA1.66 | 5410T>C           | Breast-32                      | F      |
| BRCA1.17 | 2530delAG         | Unaffected-54               | F      | BRCA1.67 | 187delAG          | Breast-36                      | F      |
| BRCA1.18 | 3748G>T           | Breast-37                   | F      | BRCA1.68 | 5326T>C           | Unaffected-55                  | F      |
| BRCA1.19 | 1240delC          | Unaffected-66               | F      | BRCA1.69 | 2257C>G           | Unaffected-43                  | F      |
| BRCA1.22 | 2634delC          | Unaffected-51               | F      | BRCA1.71 | exon 13 ins 6KB   | Breast-32,42                   | F      |
| BRCA1.23 | 262delT           | Ovarian-63                  | F      | BRCA1.72 | del exons 21-24   | Breast-43,62; Endometrium-60   | F      |
| BRCA1.24 | 3171ins5          | Unaffected-42               | F      | BRCA1.73 | 1294del40         | Breast-32                      | F      |
| BRCA1.26 | 2576delC          | Breast-31                   | F      | BRCA1.74 | 1599C>T           | Breast-42,53,55                | F      |
| BRCA1.27 | 3875del4          | Unaffected-32               | F      | BRCA1.75 | 2576delC          | Breast-47                      | F      |
| BRCA1.28 | 300T>G            | Breast-32                   | F      | BRCA1.77 | 2722C>G           | Breast-74                      | F      |
| BRCA1.29 | 1135insA          | Breast-38                   | F      | BRCA1.78 | exon 13 ins 6KB   | Breast-38                      | F      |
| BRCA1.30 | 1623del5          | Breast-39                   | F      | BRCA1.80 | 2552delC          | Breast-36                      | F      |
| BRCA1.31 | exon 13 ins 6KB   | Unaffected-42               | F      | BRCA1.81 | 2722C>G           | Breast-45,51,65; Skin-65       | F      |
| BRCA1.32 | 187delAG          | Breast-48; Peritoneum-59,62 | F      | BRCA1.83 | 1081G>A           | Breast-32; Fallopian Tube-33   | F      |
| BRCA1.33 | IVS16+3G>C        | Unaffected-52               | F      | BRCA1.84 | 3124delA          | Unaffected-53                  | F      |
| BRCA1.34 | 1294del40         | Breast-35                   | F      | BRCA1.85 | 2722C>G           | Unaffected-26                  | F      |
| BRCA1.36 | exon 5-7 deletion | Ovarian-45                  | F      | BRCA1.86 | 300T>G            | Breast-30,32,34                | F      |
| BRCA1.40 | 1294del40         | Breast-47,51                | F      | BRCA1.87 | 3203del11         | Breast-56                      | F      |
| BRCA1.41 | 300T>G            | Breast-29,48                | F      | BRCA1.90 | 2295delC          | Breast-28,40,40                | F      |
| BRCA1.42 | 5382insC          | Breast-49                   | F      | BRCA1.91 | 3438G>T           | Ovarian-41                     | F      |
| BRCA1.44 | 3600del11         | Breast-37                   | F      | BRCA1.93 | 795delT           | Unaffected-67                  | F      |
| BRCA1.46 | 1547del10         | Breast-33                   | F      | BRCA1.94 | IVS16+4A>C        | Breast-32                      | F      |
| BRCA1.47 | exon 20 deletion  | Breast-29,31                | F      | BRCA1.96 | 2722C>G           | Breast-49                      | F      |
| BRCA1.48 | 187delAG          | Breast-39; Skin-61,66       | F      | BRCA1.97 | 5215G>A           | Breast-38                      | F      |
| BRCA1.49 | IVS4-1G>T         | Breast-48,49                | F      | BRCA1.98 | 187delAG          | Unaffected-25                  | F      |

\*The variant description is as clinically reported (Myriad Genetics, Inc.)

\*\* Age at diagnosis or current age of unaffected

**Table S2 continued**

| Patient   | BRCA1-variant* | Cancer History** | Gender | Patient   | BRCA1-variant*  | Cancer History**         | Gender |
|-----------|----------------|------------------|--------|-----------|-----------------|--------------------------|--------|
| BRCA1.99  | 5228T>G        | Breast-39        | F      | BRCA1.106 | exon 13 ins 6KB | Breast-51,51; Ovarian-52 | F      |
| BRCA1.100 | 5382insC       | Breast-57        | F      | BRCA1.107 | 1294del40       | Breast-44                | F      |
| BRCA1.102 | IVS18-2delA    | Breast-40        | F      | BRCA1.108 | 5382insC        | Melanoma-38              | F      |
| BRCA1.104 | 3875del4       | Breast-49        | F      | BRCA1.111 | 1172+1G>A       | Breast-29                | F      |
| BRCA1.105 | 2529C>T        | Unaffected-40    | F      | BRCA1.112 | 4982C>A         | Breast-33                | F      |

\*The variant description is as clinically reported (Myriad Genetics, Inc.)

\*\* Age at diagnosis or current age of unaffected

**Table S3. BRCA2 - population cancer history (n=88)**

| Patient  | BRCA2-variant* | Cancer History**               | Gender | Patient  | BRCA2-variant* | Cancer History**                | Gender |
|----------|----------------|--------------------------------|--------|----------|----------------|---------------------------------|--------|
| BRCA2.1  | 1638G>T        | Unaffected-55                  | M      | BRCA2.48 | 6503delTT      | Breast-46                       | F      |
| BRCA2.2  | 7990del3ins2   | Unaffected-54                  | F      | BRCA2.49 | 6174delT       | Breast-46                       | F      |
| BRCA2.3  | 8395G>C        | Unaffected-45                  | F      | BRCA2.50 | 6672delT       | Breast-43                       | F      |
| BRCA2.4  | 8878C>T        | Breast-39                      | F      | BRCA2.51 | 6674del5       | Breast-35                       | F      |
| BRCA2.5  | 3036del4       | Breast-43,43                   | F      | BRCA2.52 | 8096A>G        | Breast-32                       | F      |
| BRCA2.6  | 999del5        | Breast-32,41                   | F      | BRCA2.53 | 7174del4       | Breast-40                       | F      |
| BRCA2.7  | 8525delC       | Breast-49                      | F      | BRCA2.54 | IVS15-1G>A     | Ovarian-50                      | F      |
| BRCA2.9  | 6174delT       | Unaffected-76                  | F      | BRCA2.55 | 2041insA       | Breast-45; Skin-53              | F      |
| BRCA2.11 | 7297delCT      | Ovarian-22,22; Thyroid-14      | F      | BRCA2.56 | 5270delTG      | Breast-46                       | F      |
| BRCA2.12 | 5263delA       | Breast-30                      | F      | BRCA2.58 | 5920delG       | Breast-44,44                    | F      |
| BRCA2.13 | 4101delA       | Breast-28,39,55; Skin-49       | F      | BRCA2.59 | 6092C>A        | Breast-32                       | F      |
| BRCA2.14 | 2041insA       | Breast-39,39                   | F      | BRCA2.61 | 8765delAG      | Breast-58; Ovarian-55; Colon-52 | F      |
| BRCA2.15 | 3427delA       | Testis-25; Ampulla of vater-51 | M      | BRCA2.63 | 4512insT       | Breast-54; Melanoma-49          | F      |
| BRCA2.16 | 5466insT       | Unaffected-43                  | F      | BRCA2.65 | 1983del5       | Melanoma-50                     | F      |
| BRCA2.17 | 5578delAA      | Breast-41                      | F      | BRCA2.67 | 9132delC       | Breast-34; Melanoma-29          | F      |
| BRCA2.18 | 6620del5       | Ovarian-60                     | F      | BRCA2.68 | 5930delAG      | Unaffected-37                   | F      |
| BRCA2.19 | 690delAA       | Breast-35,45                   | F      | BRCA2.69 | 3014insT       | Unaffected-45                   | F      |
| BRCA2.21 | 6137C>A        | Breast-55,63                   | F      | BRCA2.70 | 9382C>T        | Unaffected-53                   | F      |
| BRCA2.22 | 983del4        | Breast-37                      | F      | BRCA2.71 | 1638G>T        | Unaffected-44                   | F      |
| BRCA2.23 | 9610C>T        | Unaffected-38                  | F      | BRCA2.72 | 8395G>C        | Ovarian-61                      | F      |
| BRCA2.24 | 4965C>G        | Breast-39                      | F      | BRCA2.74 | IVS15-1G>A     | Ovarian-62,62                   | F      |
| BRCA2.25 | 9345G>A        | Breast-42,46                   | F      | BRCA2.75 | IVS15-1G>A     | Breast-48                       | F      |
| BRCA2.26 | 9631delC       | Unaffected-28                  | F      | BRCA2.76 | 5910C>G        | Breast-48,58                    | F      |
| BRCA2.27 | 9513C>G        | Breast-44                      | F      | BRCA2.77 | 6174delT       | Unaffected-24                   | F      |
| BRCA2.28 | 8765delAG      | Breast-50                      | F      | BRCA2.78 | 5910C>G        | Breast-31                       | F      |
| BRCA2.29 | 2060C>A        | Breast-43; Ovarian-45          | F      | BRCA2.79 | 6174delT       | Breast-39; Skin-55              | F      |
| BRCA2.31 | 7990del3ins2   | Breast-58; Lung-61             | F      | BRCA2.80 | 3036del4       | Unaffected-35                   | F      |
| BRCA2.34 | 7990del3ins2   | Melanoma-48                    | F      | BRCA2.81 | 7297delCT      | Breast-48; Ovarian-52           | F      |
| BRCA2.35 | 6174delT       | Skin-64                        | F      | BRCA2.82 | 5578delAA      | Breast-43                       | F      |
| BRCA2.36 | 2157delG       | Breast-39                      | F      | BRCA2.84 | 6633del5       | Unaffected-41                   | F      |
| BRCA2.37 | 6503delTT      | Breast-54                      | F      | BRCA2.85 | IVS5+1G>T      | Unaffected-37                   | F      |
| BRCA2.38 | 9631delC       | Breast-37                      | F      | BRCA2.86 | 8237C>T        | Breast-73; Peritoneum-74        | F      |
| BRCA2.39 | 9481insA       | Unaffected-47                  | F      | BRCA2.87 | 6503delTT      | Unaffected-42                   | F      |
| BRCA2.40 | 373G>T         | Breast-35                      | F      | BRCA2.88 | 5301insA       | Breast-36                       | F      |
| BRCA2.41 | 2028T>G        | Breast-50                      | F      | BRCA2.90 | 4075delGT      | Ovarian-49,49                   | F      |
| BRCA2.42 | 7297delCT      | Unaffected-59                  | M      | BRCA2.91 | 7297delCT      | Unaffected-55                   | F      |
| BRCA2.43 | 8096A>G        | Unaffected-41                  | F      | BRCA2.92 | 2157delG       | Unaffected-28                   | F      |
| BRCA2.44 | 1983del5       | Breast-58                      | F      | BRCA2.93 | 5910C>G        | Breast-37,61; Ovarian-56        | F      |

\*The variant description is as clinically reported (Myriad Genetics, Inc.)

\*\* Age at diagnosis or current age of unaffected



**Table S3 continued**

| Patient  | BRCA2-variant* | Cancer History** | Gender | Patient   | BRCA2-variant* | Cancer History**         | Gender |
|----------|----------------|------------------|--------|-----------|----------------|--------------------------|--------|
| BRCA2.94 | 4150G>T        | Breast-56        | F      | BRCA2.100 | 6306delAA      | Breast-62                | F      |
| BRCA2.95 | 6503delTT      | Unaffected-69    | F      | BRCA2.101 | 1054del5       | Unaffected-40            | F      |
| BRCA2.96 | 8141del5       | Unaffected-39    | F      | BRCA2.102 | 9371A>T        | Breast-36                | F      |
| BRCA2.97 | 3036del4       | Breast-45        | F      | BRCA2.103 | 5164del4       | Breast-58; Testicular-31 | M      |
| BRCA2.98 | 4355del4       | Breast-52        | F      | BRCA2.104 | 8764A>G        | Breast-33                | F      |
| BRCA2.99 | 6503delTT      | Ovarian-43       | F      | BRCA2.105 | 5645C>A        | Unaffected-47            | F      |

\*The variant description is as clinically reported (Myriad Genetics, Inc.)

\*\* Age at diagnosis or current age of unaffected

**Table S4. Non-BRCA population cancer history (n=82)**

| Patient | Cancer History*             | Clinical Testing                   | Gender | Patient's Family History of Cancer                      |
|---------|-----------------------------|------------------------------------|--------|---------------------------------------------------------|
| UTSW1   | Breast-38; Thyroid-38       | BRCA, CancerNext and PTEN Negative | F      | Colon, Leukemia, Lung                                   |
| UTSW2   | Unaffected-61               | BRCA Negative                      | F      | Breast, Colon, Ovarian                                  |
| UTSW3   | Adrenocortical-1            | TP53 p.R196X                       | M      | Breast, Lung, Prostate                                  |
| UTSW4   | Papillary multifocal RCC-33 | MET and VHL Negative               | M      | Breast                                                  |
| UTSW5   | Breast-48                   | BRCA Negative                      | F      | Breast, Colon, Liver, Lung                              |
| UTSW6   | Clear cell RCC-40           | VHL Negative                       | M      | none                                                    |
| UTSW7   | Breast-35                   | BreastNext Negative                | F      | Breast, Colon, Lung, Prostate                           |
| UTSW8   | Colon polyposis-30          | MYH and APC Negative               | M      | Brain, Colon                                            |
| UTSW9   | B-cell lymphoma (DLCL)-41   | Not tested                         | F      | Breast, Lung, Multiple Myeloma, RCC                     |
| UTSW10  | Unaffected-57               | BRCA Not Tested                    | F      | Brain, Breast, Lung, Stomach                            |
| UTSW11  | Pheo, PGL-53                | SDHD Negative                      | F      | Breast, Colon                                           |
| UTSW12  | Colon polyposis-51          | APC c.509del4                      | F      | none                                                    |
| UTSW13  | Leiomyoma-33                | FH c.424_425insTG                  | F      | Breast, Colon, Leiomyoma, RCC                           |
| UTSW14  | Clear cell RCC, Hb-53       | VHL Negative                       | F      | Liver, Lung                                             |
| UTSW15  | Breast-37,50                | BRCA Negative                      | F      | Breast, Ovarian                                         |
| UTSW16  | Colon polyposis-53          | APC c.5757delT                     | M      | none                                                    |
| UTSW17  | Colon-35                    | Lynch Negative, Syndrome X         | F      | Colon                                                   |
| UTSW18  | Hyperparathyroidism-29      | MEN1 Negative                      | F      | Breast, Lymphoma, Pancreatic                            |
| UTSW19  | Breast-62                   | PTEN exon 6 dup                    | F      | Brain, Breast, Esophageal, Lymphoma, Ovarian, Stomach   |
| UTSW20  | Breast-55                   | BRCA Negative                      | F      | Breast, Prostate                                        |
| UTSW21  | Unaffected-44               | Lynch MSH2 del exons 1-6           | F      | Colon, Endometrial, Pancreatic, Papillary RCC, Ovarian  |
| UTSW22  | Breast-48,56; Pancreatic-58 | BRCA and CancerNext Negative       | F      | Breast, Colon, Ovarian, Prostate, Stomach               |
| UTSW23  | Hb-52; Medullary thyroid-53 | MEN1, MEN2, VHL and RET Negative   | M      | Glioblastoma, Melanoma, Ovarian                         |
| UTSW24  | Melanoma-33; Breast-45      | BRCA Negative                      | F      | Colon, Lymphoma                                         |
| UTSW25  | Unaffected-48               | Lynch PMS2 p.M622V                 | M      | Brain, Breast                                           |
| UTSW26  | Unaffected-46               | Lynch PMS2 p.R802X                 | F      | Brain, Lymphoma                                         |
| UTSW27  | Unaffected-73               | Lynch MSH2 del exons 1-6           | F      | Endometrial, Stomach                                    |
| UTSW28  | Colon-41                    | MYH frameshift                     | F      | none                                                    |
| UTSW30  | Colon polyposis-56          | PTEN full deletion                 | M      | Brain, Breast, Colon, Prostate                          |
| UTSW31  | Colon-52                    | Lynch MSH6 c.1705_1706delTT        | M      | Endometrial                                             |
| UTSW32  | Colon-40                    | Lynch MSH6 p.R911X                 | M      | none                                                    |
| UTSW33  | Colon-46                    | Lynch Negative                     | M      | none                                                    |
| UTSW34  | Colon-53                    | Lynch Negative, Syndrome X         | M      | Colon                                                   |
| UTSW35  | Breast-36                   | BRCA Negative                      | F      | Breast, Prostate                                        |
| UTSW36  | Vulvar-64; Breast-68        | BRCA Negative                      | F      | Breast, Pancreatic, Prostate, Stomach                   |
| UTSW37  | Breast-27                   | BRCA and TP53 Negative             | F      | Endometrial, Ovarian                                    |
| UTSW38  | Papillary RCC-48            | FH c.424_425insTG                  | M      | Breast, Leiomyoma                                       |
| UTSW39  | Breast-48                   | BRCA Negative                      | F      | Breast, Colon, Lung, Ovarian                            |
| UTSW40  | Unaffected-64               | BRCA Negative                      | F      | Bladder, Breast, Lung, Melanoma, Pancreatic, Testicular |
| UTSW41  | Colon-57                    | Lynch uninformative MLH1 p.R127K   | M      | Brain, Leukemia, Lung, Lymphoma                         |
| UTSW42  | Breast-41                   | BRCA Negative                      | F      | Breast, Colon, Lung, Stomach                            |

\* Age at diagnosis or current age of unaffected

Abbreviations: Hb, Hemangioblastoma; PGL, Paraganglioma; Pheo, Pheochromocytoma; RCC, Renal Cell Carcinoma  
MyRisk (Myriad); CancerNext, BreastNext, OvaNext, RenalNext (Ambry) are all panels of cancer genes.

**Table S4 continued**

| Patient | Cancer History*                | Clinical Testing                                     | Gender | Patient's Family History of Cancer                                |
|---------|--------------------------------|------------------------------------------------------|--------|-------------------------------------------------------------------|
| UTSW43  | Breast-42                      | BRCA Negative                                        | F      | Breast                                                            |
| UTSW44  | Unaffected-27                  | Lynch MSH2 p.389X                                    | F      | Colon                                                             |
| UTSW45  | Colon-26                       | Lynch MLH1 p.V506A                                   | F      | Bladder, Breast, Colon, Endometrial, Leukemia                     |
| UTSW46  | Colon-50                       | BRCA and CancerNext Negative                         | F      | Breast, Ovarian, Clear cell RCC                                   |
| UTSW48  | Breast-56                      | BRCA Negative                                        | F      | Breast, Esophageal, Ovarian                                       |
| UTSW49  | Pheo-22; Thyroid-22            | RET c.C634R                                          | F      | Thyroid                                                           |
| UTSW50  | Unaffected-30                  | BRCA Negative                                        | F      | Breast                                                            |
| UTSW51  | Unaffected-40                  | Lynch PMS2 del exon 10                               | F      | Brain, Lung                                                       |
| UTSW52  | Unaffected-61                  | Lynch PMS2 del exon 10                               | F      | Brain, Lung                                                       |
| UTSW53  | Unaffected-30                  | Lynch MSH6 c.3037_3041delAAGAA                       | M      | Colon                                                             |
| UTSW54  | Breast-48                      | BRCA Negative                                        | F      | Breast, Endometrial, Stomach                                      |
| UTSW55  | Colon polyposis-26             | APC c.3927_3931delAAAGA                              | F      | Colon                                                             |
| UTSW56  | Unaffected-55                  | BRCA and PTEN Negative                               | F      | Breast, Thyroid                                                   |
| UTSW57  | Breast-50,54                   | BRCA Negative                                        | F      | Ovarian                                                           |
| UTSW58  | Unaffected-59                  | EGFR p.T790M                                         | F      | Lung                                                              |
| UTSW60  | Papillary RCC-36; Thyroid-36   | RenalNext Negative                                   | M      | none                                                              |
| UTSW61  | Ovarian-58                     | BRCA and OvaNext Negative                            | F      | Bladder, Colon, Endometrial, Larynx, Melanoma, Stomach            |
| UTSW62  | Breast-70                      | BRCA and BreastNext Negative                         | F      | Abdominal, Brain, Breast, Endometrial, Liver, Intestinal, Ovarian |
| UTSW63  | Breast-40; Colon-50            | BRCA Negative                                        | F      | Bladder, Lung, Meningioma                                         |
| UTSW64  | Brain-49                       | BRCA and TP53 Negative                               | F      | Breast, Colon, Leukemia, Lung, Ovarian, Prostate                  |
| UTSW65  | Breast-41,51                   | BRCA Negative                                        | F      | Breast, Esophageal, Lung, Pancreatic                              |
| UTSW66  | Breast-42; Liver-55            | BRCA and BreastNext Negative                         | F      | Breast, Lung, Ovarian, Prostate                                   |
| UTSW67  | Breast-49                      | BRCA, TP53 and BreastNext Negative                   | F      | Breast                                                            |
| UTSW68  | Breast-51                      | BRCA Negative                                        | F      | Breast, Colon, Esophageal, Intestinal, Pancreatic                 |
| UTSW69  | Breast-41                      | BRCA Negative; BreastNext positive for MUTYH p.G396D | F      | Breast, Lymphoma                                                  |
| UTSW70  | Breast-47                      | BRCA Negative                                        | F      | Brain, Breast, Liver, Lung, Ovarian                               |
| UTSW71  | Breast-45,45                   | BRCA Negative                                        | F      | Breast, Melanoma                                                  |
| UTSW72  | Breast-65                      | BRCA Negative                                        | F      | Breast, Colon, Endometrial, Esophageal, Melanoma                  |
| UTSW73  | Renal-36                       | VHL p.P2L (VUS)                                      | F      | Lymphoma, Myeloma                                                 |
| UTSW74  | Colon-55; Prostate-55          | BRCA Negative                                        | M      | Brain, Breast, Colon, Prostate, Renal                             |
| UTSW75  | Pheo-46                        | VHL Negative                                         | F      | Ovarian, Renal                                                    |
| UTSW76  | Breast-47                      | CHEK2 p.Y424H (VUS)                                  | F      | Breast, Colon, Endometrial, Prostate, Thyroid                     |
| UTSW77  | Breast-66                      | BRCA Negative                                        | F      | Breast, Chordoma, Colon, Ovarian                                  |
| UTSW78  | Breast-54,56                   | ATM c.2502dupA, RAD50 c.326_329delCAGA               | F      | Brain, Breast, Colon, Lung, Prostate                              |
| UTSW79  | Breast-12                      | TP53 del exon 1                                      | F      | Breast, Colon, Osteosarcoma, Rhabdomyosarcoma, Sarcoma            |
| UTSW80  | Ovarian-46                     | BRCA Negative                                        | F      | Breast, Lung, Stomach                                             |
| UTSW81  | Glioblastoma-50                | TP53 Negative                                        | M      | Glioblastoma, Renal                                               |
| UTSW82  | Breast-61; Renal oncocytoma-66 | BRCA Negative                                        | F      | Breast, Colon, Prostate                                           |
| UTSW83  | Thyroid-31; Ovarian-37         | MyRisk Negative                                      | F      | Bladder, Breast, Leukemia, Lymphoma, Ovarian                      |
| UTSW84  | Breast-64; Thyroid-65          | BRCA Negative                                        | F      | Breast, Prostate                                                  |
| UTSW85  | Ovarian-20                     | MyRisk Negative                                      | F      | Breast, Colon, Prostate                                           |

\* Age at diagnosis or current age of unaffected

Abbreviations: Hb, Hemangioblastoma; PGL, Paraganglioma; Pheo, Pheochromocytoma; RCC, Renal Cell Carcinoma  
MyRisk (Myriad); CancerNext, BreastNext, OvaNext, RenalNext (Ambry) are all panels of cancer genes

**Table S5. WGS Concordance for *BRCA1* and *BRCA2* Diagnostic Variants**

|                 | <b>CNVs*</b> | <b>IVS**</b> | <b>SNVs</b>     | <b>Indels</b>    | <b>SNVs+Indel</b>    |
|-----------------|--------------|--------------|-----------------|------------------|----------------------|
| <b>BRCA1</b>    | 10           | 3            | 27/29<br>93.10% | 40/46<br>86.96%  | 67/75<br>89.33%      |
| <b>BRCA2</b>    | 0            | 0            | 29/29<br>100%   | 49/59<br>83.05%  | 78/88<br>88.64%      |
| <b>All BRCA</b> | 10           | 3            | 56/58<br>96.55% | 89/105<br>84.76% | 145/163***<br>88.96% |

\* Copy number variants (CNV) were not included in the analysis

\*\* Variants in the intronic intervening sequence (IVS) not affecting the canonical splice site were not included in the analysis

\*\*\* All discordant variants, excluding one in-frame deletion identified by WGS, were detected by WGS but considered low quality

**Table S6. BRCA1 mutations identified by both clinical testing and WGS**

| Mutation Type                       | Protein Change      | # Cases | WGS* | Mutation Type                   | Protein Change | # Cases | WGS* |
|-------------------------------------|---------------------|---------|------|---------------------------------|----------------|---------|------|
| <b>Small Insertion/Deletion</b>     |                     |         |      | <b>Point Mutation (cont.)</b>   |                |         |      |
| <i>Frameshift</i>                   |                     |         |      | <i>Nonsense (stop gain)</i>     |                |         |      |
| 795delT                             | p.C179fs            | 1       | -    | 1081G>A                         | p.W274*        | 1       | +    |
| 1135insA                            | p.V293fs            | 2       | +    | 1599C>T                         | p.Q447*        | 1       | +    |
| 1240delC                            | p.T327fs            | 1       | +    | 2257C>G                         | p.S713*        | 1       | +    |
| 1294del40                           | p.L345fs            | 5       | +    | 2529C>T                         | p.Q757*        | 1       | +    |
| 1547del10                           | p.H429fs            | 1       | +    | 2722C>G                         | p.S821*        | 4       | +    |
| 1623del5                            | p.L455fs            | 1       | +    | 3438G>T                         | p.E1060*       | 1       | +    |
| 187delAG                            | p.E23fs             | 4       | +/-  | 3748G>T                         | p.E1250*       | 1       | +    |
| 2295delC                            | p.L679fs            | 1       | +    | 3937C>T                         | p.Q1313*       | 1       | +    |
| 2530delAG                           | p.Q757fs            | 1       | +    | 3987A>T                         | p.K1290*       | 1       | +    |
| 2552delC                            | p.K765fs            | 1       | -    | 5187A>T                         | p.K1690*       | 1       | -    |
| 2576delC                            | p.D774fs            | 3       | +    | 5228T>G                         | p.Y1656*       | 1       | +    |
| 262delT                             | p.M1fs              | 1       | -    | <b>Intronic</b>                 |                |         |      |
| 2634delC                            | p.H792fs            | 1       | +    | <i>Canonical Splice Site</i>    |                |         |      |
| 2798del4                            | p.K846fs            | 2       | +    | 1172+1G>A                       | --             | 1       | +    |
| 2800delAA                           | p. K847fs           | 2       | +    | IVS4-1G>T                       | --             | 1       | -    |
| 2925del4                            | p.D889fs            | 1       | +    | IVS12+22del21insA               | --             | 1       | +    |
| 3124delA                            | p.N1002fs           | 1       | +    | IVS13+1G>A                      | --             | 1       | +    |
| 3171ins5                            | p.N1018fs           | 1       | +    | IVS18-2delA                     | --             | 1       | +    |
| 3203del11                           | p.N1029fs           | 1       | +    | IVS20+1G>A                      | --             | 1       | +    |
| 3600del11                           | p.E1114fs           | 2       | +    | <i>Intervening Sequence</i>     |                |         |      |
| 3875del4                            | p.S1206fs           | 2       | +    | IVS5-11T>G                      | --             | 1       | N/A  |
| 3889delAG                           | p.E1210fs           | 1       | +    | IVS16+3G>C                      | --             | 1       | N/A  |
| 5382insC                            | p.Q1709fs           | 6       | +    | IVS16+4A>C                      | --             | 1       | N/A  |
| 5536delC                            | p.P1759fs           | 1       | -    | <b>Large Insertion/Deletion</b> |                |         |      |
| <i>In-frame</i>                     |                     |         |      | exon 5-7 del                    |                |         |      |
| 4962del15                           | p.1556_1560delPQLKV | 1       | +    | exon 13 ins 6kb                 |                |         |      |
| <b>Point Mutation</b>               |                     |         |      | exon 20 del                     |                |         |      |
| <i>Missense (amino acid change)</i> |                     |         |      | del exons 1-2                   |                |         |      |
| 300T>G                              | p.C61G              | 6       | +    | del exons 9-12                  |                |         |      |
| 4987C>G                             | p.A1576G            | 1       | +    | del exons 21-24                 |                |         |      |
| 4982C>A                             | p.A1708E            | 1       | +    |                                 |                |         |      |
| 5215G>A                             | p.R1652Q            | 1       | +    |                                 |                |         |      |
| 5326T>C                             | p.V1689A            | 1       | +    |                                 |                |         |      |
| 5410T>C                             | p.L1717P            | 1       | +    |                                 |                |         |      |

\* Whole Genome Sequence (WGS); intervening sequence variants and copy number variants were not investigated (N/A); mutations identified (+) and not identified (-) by WGS are shown

**Table S7. BRCA2 mutations identified by both clinical testing and WGS**

| Mutation Type                   | Protein Change | # Cases | WGS* | Mutation Type                           | Protein Change | # Cases | WGS* |
|---------------------------------|----------------|---------|------|-----------------------------------------|----------------|---------|------|
| <b>Small Insertion/Deletion</b> |                |         |      | <b>Small Insertion/Deletion (cont.)</b> |                |         |      |
| <i>Frameshift</i>               |                |         |      | <i>Frameshift (cont.)</i>               |                |         |      |
| 690delAA                        | p.D156fs       | 1       | +    | 8141del5                                | p.F2638fs      | 1       | +    |
| 983del4                         | p.D252fs       | 1       | +    | 8525delC                                | p.T2766fs      | 1       | +    |
| 999del5                         | p.N257fs       | 1       | +    | 8765delAG                               | p.E2846fs      | 2       | +    |
| 1054del5                        | p.V276fs       | 1       | +    | 9132delC                                | p.V2969fs      | 1       | -    |
| 1983del5                        | p.K585fs       | 2       | +    | 9481insA                                | p.T3085fs      | 1       | -    |
| 2041insA                        | p.I605fs       | 2       | -    | 9631delC                                | p.L3135fs      | 2       | +    |
| 2157delG                        | p.R645fs       | 2       | +    | <b>Point Mutation</b>                   |                |         |      |
| 3014insT                        | p.L929fs       | 1       | -    | <i>Missense</i>                         |                |         |      |
| 3036del4                        | p.A938fs       | 3       | +    | 8096A>G                                 | p.H2623R       | 2       | +    |
| 3427delA                        | p.T1067fs      | 1       | +    | 8237C>T                                 | p.S2670L       | 1       | +    |
| 4075delGT                       | p.V1283fs      | 1       | +    | 8395G>C                                 | p.D2723H       | 2       | +    |
| 4101delA                        | p.Q1291fs      | 1       | +    | 8764A>G                                 | p.S2922G       | 1       | +    |
| 4355del4                        | p.G1376fs      | 1       | +    | 9345G>A                                 | p.P3039P       | 1       | +    |
| 4512insT                        | p.Q1429fs      | 1       | -    | 9371A>T                                 | p.N3124I       | 1       | +    |
| 5164del4                        | p.E1646fs      | 1       | +    | 9382C>T                                 | p.R3052W       | 1       | +    |
| 5263delA                        | p.T1679fs      | 1       | -    | 9513C>G                                 | p.D3095E       | 1       | +    |
| 5270delTG                       | p.V1681fs      | 1       | +    | <i>Nonsense</i>                         |                |         |      |
| 5301insA                        | p.W1692fs      | 1       | -    | 373G>T                                  | p.E49*         | 1       | +    |
| 5466insT                        | p.N1747fs      | 1       | +    | 1638G>T                                 | p.E471*        | 2       | +    |
| 5578delAA                       | p.N1784fs      | 2       | +    | 2028T>G                                 | p.Y600*        | 1       | +    |
| 5920delG                        | p.D12898fs     | 1       | +    | 2060C>A                                 | p.S611*        | 1       | +    |
| 5930delAG                       | p.E1901fs      | 1       | +    | 4150G>T                                 | p.E1308*       | 1       | +    |
| 6174delT                        | p.S1982fs      | 5       | +    | 4965C>G                                 | p.Y1655*       | 1       | +    |
| 6306delAA                       | p.E2028fs      | 1       | +    | 5645C>A                                 | p.S1882*       | 1       | +    |
| 6503delTT                       | p.L2092fs      | 5       | +    | 5910C>G                                 | p.Y1894*       | 3       | +    |
| 6620del5                        | p.K2131fs      | 1       | +    | 6092C>A                                 | p.S1955*       | 1       | +    |
| 6633del5                        | p.N2135fs      | 1       | +    | 6137C>A                                 | p.S1970*       | 1       | +    |
| 6672delT                        | p.I2149fs      | 1       | +    | 8878C>T                                 | p.Q2960*       | 1       | +    |
| 6674del5                        | p.I2149fs      | 1       | +    | 9610C>T                                 | p.R3128*       | 1       | +    |
| 7174del4                        | p.I2315fs      | 1       | -    | <b>Intronic</b>                         |                |         |      |
| 7297delCT                       | p.L2357fs      | 4       | +/-  | IVS5+1G>T                               | --             | 1       | +    |
| 7990del3ins2                    | p.I2588fs      | 3       | +    | IVS15-1G>A                              | --             | 3       | +    |

\* Whole Genome Sequence (WGS); mutations identified (+) and not identified (-) by WGS are shown

**Table S8. Distribution of nonsynonymous potentially pathogenic variants**

|                        | <b>In-frame<br/>Deletion</b> | <b>In-frame<br/>Insertion</b> | <b>Missense</b> | <b>Splice<br/>Disrupt</b> | <b>Frameshift</b> | <b>Nonsense</b> | <b>Misstart</b> | <b>Nonstop</b> | <b>All</b> |
|------------------------|------------------------------|-------------------------------|-----------------|---------------------------|-------------------|-----------------|-----------------|----------------|------------|
| Number of<br>Variants* | 12                           | 3                             | 577             | 11                        | 45                | 46              | 1               | 0              | 695        |
| Percent<br>Novel**     | 100%                         | 100%                          | 36.40%          | 100%                      | 100%              | 89.13%          | 0%              | 0%             | 46.33%     |

\* *BRCA1* and *BRCA2* pathogenic variants were not included

\*\* Not present in the ESP6500 database

**Table S9. Number of potentially pathogenic variants and individuals in cancer-associated genes in the *BRCA1/2*-cohort**

| Gene    | All Variants |          | LoF Variants |          | Gene    | All Variants |          | LoF Variants |          | Gene    | All Variants |          | LoF Variants |          |
|---------|--------------|----------|--------------|----------|---------|--------------|----------|--------------|----------|---------|--------------|----------|--------------|----------|
|         | Cases        | Variants | Cases        | Variants |         | Cases        | Variants | Cases        | Variants |         | Cases        | Variants | Cases        | Variants |
| ATM     | 22           | 18       | 2            | 2        | BAP1    | 3            | 3        | 0            | 0        | XRCC2   | 1            | 1        | 0            | 0        |
| BRCA2*  | 31           | 17       | 0            | 0        | NF1     | 4            | 3        | 0            | 0        | XRCC3   | 1            | 1        | 0            | 0        |
| APC     | 16           | 13       | 0            | 0        | FLCN    | 3            | 3        | 0            | 0        | FH      | 1            | 1        | 0            | 0        |
| BRCA1*  | 22           | 11       | 0            | 0        | NTRK1   | 2            | 3        | 0            | 0        | BLM     | 0            | 0        | 0            | 0        |
| TSC2    | 12           | 10       | 0            | 0        | MRE11A  | 4            | 2        | 0            | 0        | CDH1    | 0            | 0        | 0            | 0        |
| TP53BP1 | 13           | 10       | 0            | 0        | GALNT12 | 2            | 2        | 0            | 0        | EGFR    | 0            | 0        | 0            | 0        |
| CREBBP  | 9            | 8        | 0            | 0        | EPCAM   | 2            | 2        | 0            | 0        | CDKN1A  | 0            | 0        | 0            | 0        |
| ATR     | 12           | 7        | 0            | 0        | GREM1   | 3            | 2        | 0            | 0        | KIT     | 0            | 0        | 0            | 0        |
| MLH3    | 8            | 7        | 0            | 0        | MUTYH   | 2            | 2        | 0            | 0        | VHL     | 0            | 0        | 0            | 0        |
| SMO     | 8            | 6        | 0            | 0        | GEN1    | 37           | 2        | 36           | 1        | WT1     | 0            | 0        | 0            | 0        |
| PMS2    | 13           | 6        | 0            | 0        | NBN     | 2            | 2        | 0            | 0        | BRIP1   | 0            | 0        | 0            | 0        |
| RB1     | 7            | 6        | 0            | 0        | RAD51   | 2            | 2        | 0            | 0        | CDC73   | 0            | 0        | 0            | 0        |
| MSH6    | 9            | 6        | 0            | 0        | SDHB    | 2            | 2        | 0            | 0        | CHEK1   | 0            | 0        | 0            | 0        |
| MSH2    | 12           | 5        | 0            | 0        | ELAC2   | 2            | 2        | 0            | 0        | HOXB13  | 0            | 0        | 0            | 0        |
| MET     | 11           | 5        | 0            | 0        | SDHC    | 3            | 1        | 0            | 0        | MEN1    | 0            | 0        | 0            | 0        |
| KDR     | 5            | 5        | 0            | 0        | SMAD4   | 2            | 1        | 0            | 0        | PTEN    | 0            | 0        | 0            | 0        |
| CHEK2   | 5            | 5        | 2            | 2        | CDKN2B  | 1            | 1        | 1            | 1        | RAD51D  | 0            | 0        | 0            | 0        |
| PDGFRA  | 5            | 5        | 0            | 0        | MITF    | 1            | 1        | 0            | 0        | RAS     | 0            | 0        | 0            | 0        |
| RAD50   | 9            | 5        | 1            | 1        | RAD51C  | 1            | 1        | 0            | 0        | SDHAF2  | 0            | 0        | 0            | 0        |
| BARD1   | 29           | 5        | 0            | 0        | RET     | 2            | 1        | 0            | 0        | SDHD    | 0            | 0        | 0            | 0        |
| TSC1    | 5            | 5        | 0            | 0        | BMPR1A  | 1            | 1        | 0            | 0        | SMARCB1 | 0            | 0        | 0            | 0        |
| PTCH1   | 5            | 5        | 0            | 0        | CDK4    | 1            | 1        | 0            | 0        | STK11   | 0            | 0        | 0            | 0        |
| PALB2   | 5            | 4        | 0            | 0        | CDKN2A  | 1            | 1        | 0            | 0        | TP53    | 0            | 0        | 0            | 0        |
| JAK2    | 6            | 4        | 0            | 0        | MLH1    | 1            | 1        | 0            | 0        |         |              |          |              |          |
| FAM175A | 4            | 4        | 0            | 0        | NF2     | 1            | 1        | 0            | 0        |         |              |          |              |          |

\* Additional *BRCA* variants after excluding the primary diagnostic deleterious variant

"Potentially pathogenic" is defined as a nonsynonymous variant with a frequency <1% in both the Exome Variant Server (ESP6500) and HapMap control datasets  
LoF, loss-of-function nonsynonymous variants defined as SNVs predicted to create a premature truncation (nonsense, disrupt, misstart or nontstop) and indels resulting in a frameshift



**Table S10. Number of potentially pathogenic variants in disease genes (other than cancer) in the *BRCA1/2*-cohort**

| Gene     | All Variants |          | LoF Variants |          | Gene     | All Variants |          | LoF Variants |          | Gene    | All Variants |          | LoF Variants |          |
|----------|--------------|----------|--------------|----------|----------|--------------|----------|--------------|----------|---------|--------------|----------|--------------|----------|
|          | Cases        | Variants | Cases        | Variants |          | Cases        | Variants | Cases        | Variants |         | Cases        | Variants | Cases        | Variants |
| APOB     | 22           | 19       | 0            | 0        | COL3A1   | 8            | 4        | 0            | 0        | HFE2    | 2            | 2        | 0            | 0        |
| CFTR     | 28           | 19       | 1            | 1        | HMBS     | 4            | 4        | 0            | 0        | KCNJ2   | 2            | 2        | 0            | 0        |
| RYR1     | 21           | 17       | 1            | 1        | LDLR     | 4            | 4        | 0            | 0        | MYL2    | 2            | 2        | 1            | 1        |
| CACNA1S  | 84           | 16       | 1            | 1        | PCSK9    | 4            | 4        | 1            | 1        | PRKAG2  | 2            | 2        | 0            | 0        |
| DMD      | 19           | 14       | 0            | 0        | TMEM43   | 8            | 4        | 0            | 0        | TGFBR1  | 2            | 2        | 0            | 0        |
| DSP      | 15           | 13       | 0            | 0        | LDLRAP1  | 4            | 4        | 1            | 1        | IDUA    | 1            | 1        | 1            | 1        |
| ATP7B    | 10           | 12       | 0            | 0        | KCNH2    | 6            | 3        | 0            | 0        | OTC     | 19           | 1        | 0            | 0        |
| HTT      | 44           | 11       | 0            | 0        | HIP1     | 4            | 3        | 0            | 0        | KCNE3   | 6            | 1        | 0            | 0        |
| F5       | 20           | 11       | 1            | 1        | SLC25A13 | 3            | 3        | 0            | 0        | KCNE2   | 1            | 1        | 0            | 0        |
| FBN1     | 10           | 9        | 0            | 0        | DSC2     | 6            | 3        | 4            | 1        | KCNE1   | 1            | 1        | 0            | 0        |
| MYBPC3   | 11           | 8        | 0            | 0        | SERPINC1 | 5            | 3        | 0            | 0        | LMNA    | 1            | 1        | 0            | 0        |
| MYH11    | 9            | 8        | 0            | 0        | KCNQ1    | 4            | 3        | 0            | 0        | MYL3    | 1            | 1        | 0            | 0        |
| PKP2     | 12           | 8        | 0            | 0        | CASQ2    | 3            | 3        | 0            | 0        | QDPR    | 1            | 1        | 0            | 0        |
| MYLK     | 13           | 8        | 0            | 0        | COQ2     | 3            | 3        | 0            | 0        | SCN1B   | 1            | 1        | 0            | 0        |
| BCHE     | 8            | 8        | 0            | 0        | TGFB3    | 3            | 3        | 0            | 0        | TNNI3   | 1            | 1        | 0            | 0        |
| RYR2     | 7            | 7        | 0            | 0        | TGFBR2   | 3            | 3        | 0            | 0        | PTS     | 1            | 1        | 1            | 1        |
| SLC7A9   | 6            | 7        | 1            | 1        | HOXB1    | 7            | 3        | 0            | 0        | SGCD    | 1            | 1        | 0            | 0        |
| SCN5A    | 8            | 6        | 0            | 0        | PAH      | 2            | 2        | 0            | 0        | TNNT2   | 0            | 0        | 0            | 0        |
| CACNA1C  | 43           | 6        | 0            | 0        | CACNB2   | 4            | 2        | 0            | 0        | ACTA2   | 0            | 0        | 0            | 0        |
| RBM20    | 8            | 6        | 0            | 0        | KCNH1    | 2            | 2        | 0            | 0        | ACTC1   | 0            | 0        | 0            | 0        |
| DSG2     | 6            | 6        | 0            | 0        | CPT2     | 4            | 2        | 0            | 0        | ENG     | 0            | 0        | 0            | 0        |
| PRSS1    | 8            | 5        | 0            | 0        | CNBP     | 2            | 2        | 0            | 0        | GCH1    | 0            | 0        | 0            | 0        |
| HCN4     | 19           | 5        | 0            | 0        | EMD      | 2            | 2        | 0            | 0        | PCBD1   | 0            | 0        | 0            | 0        |
| SLC37A4  | 6            | 5        | 1            | 1        | HFE      | 8            | 2        | 0            | 0        | PLN     | 0            | 0        | 0            | 0        |
| GAA      | 5            | 5        | 1            | 1        | COQ9     | 5            | 2        | 0            | 0        | PRKAR1A | 0            | 0        | 0            | 0        |
| DMPK     | 5            | 5        | 0            | 0        | PROS1    | 5            | 2        | 0            | 0        | PROC    | 0            | 0        | 0            | 0        |
| MYH7     | 5            | 4        | 0            | 0        | HAMP     | 2            | 2        | 0            | 0        | RBBP8   | 0            | 0        | 0            | 0        |
| HIP1R    | 4            | 4        | 0            | 0        | ACVRL1   | 2            | 2        | 0            | 0        | SCN3B   | 0            | 0        | 0            | 0        |
| INPP5B   | 4            | 4        | 2            | 2        | GLA      | 2            | 2        | 0            | 0        | SMAD3   | 0            | 0        | 0            | 0        |
| SERPINA1 | 12           | 4        | 0            | 0        | GPD1L    | 2            | 2        | 1            | 1        | TPM1    | 0            | 0        | 0            | 0        |

"Potentially pathogenic" is defined as a nonsynonymous variant with a frequency <1% in both the Exome Variant Server (ESP6500) and HapMap control datasets

LoF, loss-of-function nonsynonymous variants defined as SNVs predicted to create a premature truncation (nonsense, disrupt, misstart or nontstop) and indels resulting in a frameshift

**Table S11. Number of potentially pathogenic variants in cancer-associated genes for *BRCA1*- and *BRCA2*-mutant cohorts**

| Gene    | BRCA1        |          |              |          | BRCA2        |          |              |          |
|---------|--------------|----------|--------------|----------|--------------|----------|--------------|----------|
|         | All Variants |          | LoF Variants |          | All Variants |          | LoF Variants |          |
|         | Cases        | Variants | Cases        | Variants | Cases        | Variants | Cases        | Variants |
| APC     | 8            | 6        | 0            | 0        | 6            | 6        | 0            | 0        |
| ATM     | 5            | 6        | 1            | 1        | 6            | 5        | 1            | 1        |
| ATR     | 7            | 5        | 0            | 0        | 2            | 2        | 0            | 0        |
| BAP1    | 0            | 0        | 0            | 0        | 1            | 1        | 0            | 0        |
| BARD1   | 9            | 4        | 0            | 0        | 6            | 2        | 0            | 0        |
| BLM     | 1            | 1        | 0            | 0        | 2            | 2        | 0            | 0        |
| BMPR1A  | 0            | 0        | 0            | 0        | 1            | 1        | 0            | 0        |
| BRCA1*  | 16           | 7        | 0            | 0        | 6            | 5        | 0            | 0        |
| BRCA2*  | 15           | 11       | 0            | 0        | 16           | 9        | 0            | 0        |
| BRIP1   | 0            | 0        | 0            | 0        | 0            | 0        | 0            | 0        |
| CDC73   | 0            | 0        | 0            | 0        | 0            | 0        | 0            | 0        |
| CDH1    | 2            | 2        | 0            | 0        | 1            | 1        | 0            | 0        |
| CDK4    | 1            | 1        | 0            | 0        | 0            | 0        | 0            | 0        |
| CDKN1A  | 0            | 0        | 0            | 0        | 0            | 0        | 0            | 0        |
| CDKN2A  | 1            | 1        | 0            | 0        | 0            | 0        | 0            | 0        |
| CDKN2B  | 0            | 0        | 0            | 0        | 0            | 0        | 0            | 0        |
| CHEK1   | 0            | 0        | 0            | 0        | 0            | 0        | 0            | 0        |
| CHEK2   | 1            | 1        | 1            | 1        | 1            | 1        | 0            | 0        |
| CREBBP  | 3            | 3        | 0            | 0        | 3            | 3        | 0            | 0        |
| EGFR    | 0            | 0        | 0            | 0        | 0            | 0        | 0            | 0        |
| ELAC2   | 0            | 0        | 0            | 0        | 0            | 0        | 0            | 0        |
| EPCAM   | 1            | 1        | 0            | 0        | 0            | 0        | 0            | 0        |
| FAM175A | 1            | 1        | 0            | 0        | 0            | 0        | 0            | 0        |
| FH      | 0            | 0        | 0            | 0        | 0            | 0        | 0            | 0        |
| FLCN    | 0            | 0        | 0            | 0        | 2            | 2        | 0            | 0        |
| GALNT12 | 0            | 0        | 0            | 0        | 1            | 1        | 0            | 0        |
| GEN1    | 10           | 1        | 10           | 1        | 17           | 2        | 16           | 1        |
| GREM1   | 0            | 0        | 0            | 0        | 2            | 2        | 0            | 0        |
| HOXB13  | 0            | 0        | 0            | 0        | 0            | 0        | 0            | 0        |
| JAK2    | 2            | 2        | 0            | 0        | 1            | 1        | 0            | 0        |
| KDR     | 1            | 1        | 0            | 0        | 2            | 2        | 0            | 0        |
| KIT     | 0            | 0        | 0            | 0        | 0            | 0        | 0            | 0        |
| MEN1    | 0            | 0        | 0            | 0        | 0            | 0        | 0            | 0        |
| MET     | 2            | 2        | 0            | 0        | 6            | 4        | 0            | 0        |
| MITF    | 0            | 0        | 0            | 0        | 0            | 0        | 0            | 0        |
| MLH1    | 1            | 1        | 0            | 0        | 0            | 0        | 0            | 0        |
| MLH3    | 3            | 3        | 0            | 0        | 1            | 1        | 0            | 0        |
| MRE11A  | 2            | 2        | 0            | 0        | 1            | 1        | 0            | 0        |
| MSH2    | 2            | 2        | 0            | 0        | 5            | 3        | 0            | 0        |
| MSH6    | 5            | 4        | 0            | 0        | 1            | 1        | 0            | 0        |
| MUTYH   | 1            | 1        | 0            | 0        | 0            | 0        | 0            | 0        |
| NBN     | 0            | 0        | 0            | 0        | 1            | 1        | 0            | 0        |
| NF1     | 2            | 1        | 0            | 0        | 1            | 1        | 0            | 0        |
| NF2     | 0            | 0        | 0            | 0        | 1            | 1        | 0            | 0        |
| NTRK1   | 2            | 3        | 0            | 0        | 0            | 0        | 0            | 0        |
| PALB2   | 1            | 1        | 0            | 0        | 4            | 3        | 0            | 0        |
| PDGFRA  | 2            | 2        | 0            | 0        | 2            | 2        | 0            | 0        |

\* Additional *BRCA* variants after excluding the primary diagnostic deleterious variant

"Potentially pathogenic" is defined as a nonsynonymous variant with a frequency <1% in both the Exome Variant Server (ESP6500) and HapMap control datasets

**Table S11 continued**

| Gene    | BRCA1        |          |              |          | BRCA2        |          |              |          |
|---------|--------------|----------|--------------|----------|--------------|----------|--------------|----------|
|         | All Variants |          | LoF Variants |          | All Variants |          | LoF Variants |          |
|         | Cases        | Variants | Cases        | Variants | Cases        | Variants | Cases        | Variants |
| PMS2    | 6            | 4        | 0            | 0        | 3            | 2        | 0            | 0        |
| PTCH1   | 1            | 1        | 0            | 0        | 1            | 1        | 0            | 0        |
| PTEN    | 0            | 0        | 0            | 0        | 0            | 0        | 0            | 0        |
| RAD50   | 4            | 3        | 0            | 0        | 4            | 3        | 1            | 1        |
| RAD51   | 2            | 2        | 0            | 0        | 0            | 0        | 0            | 0        |
| RAD51C  | 0            | 0        | 0            | 0        | 0            | 0        | 0            | 0        |
| RAD51D  | 0            | 0        | 0            | 0        | 0            | 0        | 0            | 0        |
| RAS     | 0            | 0        | 0            | 0        | 0            | 0        | 0            | 0        |
| RB1     | 3            | 3        | 0            | 0        | 1            | 1        | 0            | 0        |
| RET     | 2            | 1        | 0            | 0        | 0            | 0        | 0            | 0        |
| SDHAF2  | 0            | 0        | 0            | 0        | 0            | 0        | 0            | 0        |
| SDHB    | 2            | 2        | 0            | 0        | 0            | 0        | 0            | 0        |
| SDHC    | 1            | 1        | 0            | 0        | 1            | 1        | 0            | 0        |
| SDHD    | 0            | 0        | 0            | 0        | 0            | 0        | 0            | 0        |
| SMAD4   | 1            | 1        | 0            | 0        | 1            | 1        | 0            | 0        |
| SMARCB1 | 0            | 0        | 0            | 0        | 0            | 0        | 0            | 0        |
| SMO     | 2            | 2        | 0            | 0        | 5            | 4        | 0            | 0        |
| STK11   | 0            | 0        | 0            | 0        | 0            | 0        | 0            | 0        |
| TP53    | 0            | 0        | 0            | 0        | 0            | 0        | 0            | 0        |
| TP53BP1 | 6            | 5        | 0            | 0        | 5            | 5        | 0            | 0        |
| TSC1    | 0            | 0        | 0            | 0        | 2            | 2        | 0            | 0        |
| TSC2    | 3            | 3        | 0            | 0        | 4            | 4        | 0            | 0        |
| VHL     | 0            | 0        | 0            | 0        | 0            | 0        | 0            | 0        |
| WT1     | 0            | 0        | 0            | 0        | 0            | 0        | 0            | 0        |
| XRCC2   | 0            | 0        | 0            | 0        | 0            | 0        | 0            | 0        |
| XRCC3   | 0            | 0        | 0            | 0        | 0            | 0        | 0            | 0        |

\* Additional *BRCA* variants after excluding the primary diagnostic deleterious variant

"Potentially pathogenic" is defined as a nonsynonymous variant with a frequency <1% in both the Exome Variant Server (ESP6500) and HapMap control datasets

**Table S12. Number of potentially pathogenic variants in disease genes (other than cancer) for *BRCA1*- and *BRCA2*-mutant cohorts**

| Gene    | BRCA1        |          |              |          | BRCA2        |          |              |          |
|---------|--------------|----------|--------------|----------|--------------|----------|--------------|----------|
|         | All Variants |          | LoF Variants |          | All Variants |          | LoF Variants |          |
|         | Cases        | Variants | Cases        | Variants | Cases        | Variants | Cases        | Variants |
| ACTA2   | 0            | 0        | 0            | 0        | 0            | 0        | 0            | 0        |
| ACTC1   | 0            | 0        | 0            | 0        | 0            | 0        | 0            | 0        |
| ACVRL1  | 1            | 1        | 0            | 0        | 1            | 1        | 0            | 0        |
| APOB    | 8            | 7        | 0            | 0        | 4            | 4        | 0            | 0        |
| ATP7B   | 1            | 1        | 0            | 0        | 5            | 7        | 0            | 0        |
| BCHE    | 2            | 2        | 0            | 0        | 2            | 3        | 0            | 0        |
| CACNA1C | 14           | 3        | 0            | 0        | 14           | 4        | 0            | 0        |
| CACNA1S | 23           | 7        | 0            | 0        | 33           | 7        | 0            | 0        |
| CACNB2  | 1            | 1        | 0            | 0        | 0            | 0        | 0            | 0        |
| CASQ2   | 1            | 1        | 0            | 0        | 0            | 0        | 0            | 0        |
| CFTR    | 7            | 7        | 0            | 0        | 10           | 8        | 0            | 0        |
| CNBP    | 0            | 0        | 0            | 0        | 1            | 1        | 0            | 0        |
| COL3A1  | 2            | 1        | 0            | 0        | 3            | 2        | 0            | 0        |
| COQ2    | 2            | 2        | 0            | 0        | 0            | 0        | 0            | 0        |
| COQ9    | 1            | 1        | 0            | 0        | 2            | 2        | 0            | 0        |
| CPT2    | 1            | 1        | 0            | 0        | 2            | 2        | 0            | 0        |
| DMD     | 5            | 4        | 0            | 0        | 7            | 7        | 0            | 0        |
| DMPK    | 0            | 0        | 0            | 0        | 5            | 5        | 0            | 0        |
| DSC2    | 1            | 1        | 0            | 0        | 4            | 3        | 3            | 1        |
| DSG2    | 2            | 2        | 0            | 0        | 2            | 2        | 0            | 0        |
| DSP     | 7            | 7        | 0            | 0        | 4            | 4        | 0            | 0        |
| EMD     | 1            | 1        | 0            | 0        | 0            | 0        | 0            | 0        |
| ENG     | 0            | 0        | 0            | 0        | 0            | 0        | 0            | 0        |
| F5      | 7            | 4        | 0            | 0        | 4            | 4        | 0            | 0        |
| FBN1    | 3            | 3        | 0            | 0        | 4            | 4        | 0            | 0        |
| GAA     | 2            | 2        | 0            | 0        | 3            | 3        | 1            | 1        |
| GCH1    | 0            | 0        | 0            | 0        | 0            | 0        | 0            | 0        |
| GLA     | 0            | 0        | 0            | 0        | 1            | 1        | 0            | 0        |
| GPD1L   | 0            | 0        | 0            | 0        | 0            | 0        | 0            | 0        |
| HAMP    | 0            | 0        | 0            | 0        | 1            | 1        | 0            | 0        |
| HCN4    | 0            | 0        | 0            | 0        | 13           | 4        | 0            | 0        |
| HFE     | 2            | 1        | 0            | 0        | 4            | 2        | 0            | 0        |
| HFE2    | 1            | 1        | 0            | 0        | 0            | 0        | 0            | 0        |
| HIP1    | 2            | 2        | 0            | 0        | 2            | 2        | 0            | 0        |
| HIP1R   | 1            | 1        | 0            | 0        | 1            | 1        | 0            | 0        |
| HMBS    | 3            | 3        | 0            | 0        | 1            | 1        | 0            | 0        |
| HOXB1   | 4            | 2        | 0            | 0        | 3            | 2        | 0            | 0        |
| HTT     | 17           | 6        | 0            | 0        | 12           | 4        | 0            | 0        |
| IDUA    | 0            | 0        | 0            | 0        | 1            | 1        | 1            | 1        |
| INPP5B  | 1            | 1        | 1            | 1        | 1            | 1        | 0            | 0        |
| KCNE1   | 0            | 0        | 0            | 0        | 1            | 1        | 0            | 0        |
| KCNE2   | 0            | 0        | 0            | 0        | 1            | 1        | 0            | 0        |
| KCNE3   | 3            | 1        | 0            | 0        | 2            | 1        | 0            | 0        |
| KCNH1   | 0            | 0        | 0            | 0        | 0            | 0        | 0            | 0        |
| KCNH2   | 2            | 2        | 0            | 0        | 1            | 1        | 0            | 0        |
| KCNJ2   | 1            | 1        | 0            | 0        | 1            | 1        | 0            | 0        |
| KCNQ1   | 1            | 1        | 0            | 0        | 2            | 2        | 0            | 0        |
| LDLR    | 2            | 2        | 0            | 0        | 1            | 1        | 0            | 0        |

"Potentially pathogenic" is defined as a nonsynonymous variant with a frequency <1% in both the Exome Variant Server (ESP6500) and HapMap control datasets

**Table S12 continued**

| Gene     | BRCA1        |          |              |          | BRCA2        |          |              |          |
|----------|--------------|----------|--------------|----------|--------------|----------|--------------|----------|
|          | All Variants |          | LoF Variants |          | All Variants |          | LoF Variants |          |
|          | Cases        | Variants | Cases        | Variants | Cases        | Variants | Cases        | Variants |
| LDLRAP1  | 2            | 2        | 0            | 0        | 1            | 1        | 1            | 1        |
| LMNA     | 0            | 0        | 0            | 0        | 0            | 0        | 0            | 0        |
| MYBPC3   | 4            | 4        | 0            | 0        | 2            | 2        | 0            | 0        |
| MYH11    | 6            | 5        | 0            | 0        | 3            | 4        | 0            | 0        |
| MYH7     | 1            | 2        | 0            | 0        | 2            | 2        | 0            | 0        |
| MYL2     | 1            | 1        | 0            | 0        | 0            | 0        | 0            | 0        |
| MYL3     | 0            | 0        | 0            | 0        | 0            | 0        | 0            | 0        |
| MYLK     | 7            | 5        | 0            | 0        | 6            | 4        | 0            | 0        |
| OTC      | 5            | 1        | 0            | 0        | 8            | 1        | 0            | 0        |
| PAH      | 2            | 2        | 0            | 0        | 0            | 0        | 0            | 0        |
| PCBD1    | 0            | 0        | 0            | 0        | 0            | 0        | 0            | 0        |
| PCSK9    | 1            | 1        | 0            | 0        | 2            | 2        | 1            | 1        |
| PKP2     | 3            | 3        | 0            | 0        | 4            | 3        | 0            | 0        |
| PLN      | 0            | 0        | 0            | 0        | 0            | 0        | 0            | 0        |
| PRKAG2   | 0            | 0        | 0            | 0        | 2            | 2        | 0            | 0        |
| PRKAR1A  | 0            | 0        | 0            | 0        | 0            | 0        | 0            | 0        |
| PROC     | 0            | 0        | 0            | 0        | 0            | 0        | 0            | 0        |
| PROS1    | 2            | 1        | 0            | 0        | 1            | 1        | 0            | 0        |
| PRSS1    | 5            | 4        | 0            | 0        | 3            | 3        | 0            | 0        |
| PTS      | 1            | 1        | 1            | 1        | 0            | 0        | 0            | 0        |
| QDPR     | 0            | 0        | 0            | 0        | 0            | 0        | 0            | 0        |
| RBBP8    | 0            | 0        | 0            | 0        | 0            | 0        | 0            | 0        |
| RBM20    | 1            | 1        | 0            | 0        | 3            | 3        | 0            | 0        |
| RYR1     | 12           | 12       | 1            | 1        | 4            | 3        | 0            | 0        |
| RYR2     | 4            | 4        | 0            | 0        | 2            | 2        | 0            | 0        |
| SCN1B    | 1            | 1        | 0            | 0        | 0            | 0        | 0            | 0        |
| SCN3B    | 0            | 0        | 0            | 0        | 0            | 0        | 0            | 0        |
| SCN5A    | 4            | 4        | 0            | 0        | 1            | 1        | 0            | 0        |
| SERPINC1 | 3            | 3        | 0            | 0        | 1            | 1        | 0            | 0        |
| SGCD     | 0            | 0        | 0            | 0        | 0            | 0        | 0            | 0        |
| SLC25A13 | 0            | 0        | 0            | 0        | 0            | 0        | 0            | 0        |
| SLC37A4  | 1            | 1        | 0            | 0        | 2            | 2        | 0            | 0        |
| SLC7A9   | 2            | 2        | 1            | 1        | 1            | 1        | 0            | 0        |
| SMAD3    | 0            | 0        | 0            | 0        | 0            | 0        | 0            | 0        |
| TGFB3    | 1            | 1        | 0            | 0        | 2            | 2        | 0            | 0        |
| TGFBR1   | 0            | 0        | 0            | 0        | 1            | 1        | 0            | 0        |
| TGFBR2   | 2            | 2        | 0            | 0        | 0            | 0        | 0            | 0        |
| TMEM43   | 3            | 1        | 0            | 0        | 0            | 0        | 0            | 0        |
| TNNI3    | 0            | 0        | 0            | 0        | 0            | 0        | 0            | 0        |
| TNNT2    | 0            | 0        | 0            | 0        | 0            | 0        | 0            | 0        |
| TPM1     | 0            | 0        | 0            | 0        | 0            | 0        | 0            | 0        |

"Potentially pathogenic" is defined as a nonsynonymous variant with a frequency <1% in both the Exome Variant Server (ESP6500) and HapMap control datasets

**Table S13. Performance of WGS Variance Analysis**

|                               | PPV Allele Frequency Threshold | Heterozygous Rate Threshold | Interpretable Genes (%) |             |              |
|-------------------------------|--------------------------------|-----------------------------|-------------------------|-------------|--------------|
|                               |                                |                             | All PPVs                | LoF PPVs    | LoF SNV PPVs |
| <b>163 Disease-Gene Panel</b> | 1%                             | 1%                          | 31.7                    | 96.9        | na           |
|                               | <b>1%</b>                      | <b>2%</b>                   | <b>52.8</b>             | <b>98.8</b> | na           |
|                               | 0.50%                          | 1%                          | 32.9                    | 96.9        | na           |
|                               | 0.10%                          | 1%                          | 42.2                    | 96.9        | na           |
|                               | 0.10%                          | 0.20%                       | 21.7                    | 87.6        | na           |
| <b>ClinVar</b>                | 1%                             | 1%                          | 39.8                    | 96.4        | 98.5         |
|                               | <b>1%</b>                      | <b>2%</b>                   | <b>60.0</b>             | <b>98.6</b> | <b>99.6</b>  |
|                               | 0.50%                          | 1%                          | 40.6                    | 96.4        | 98.5         |
|                               | 0.10%                          | 1%                          | 46.5                    | 96.8        | 98.8         |
|                               | 0.10%                          | 0.20%                       | 27.6                    | 88.5        | 93.6         |

Interpretable genes = genes with <2% of the *BRCA1/2* cohort reporting PPVs

LoF = Loss-of-Function (nonsense, splice-site, frameshift, nonstop, misstart)

PPV = predicted pathogenic variant

SNV = single nucleotide variant

**Table S14. Potentially pathogenic LoF variants in disease genes (other than cancer) in *BRCA1/2*-mutant individuals**

| Patient                    | Gene    | Variant*                 | Pred Dz | Clinical Hx |
|----------------------------|---------|--------------------------|---------|-------------|
| <i>Autosomal Dominant</i>  |         |                          |         |             |
| BRCA1.42                   | DSC2    | <b>p.Ala897Lysfs*4</b>   | ARVC    | N.E.        |
| BRCA1.87                   | RYR1    | c.9001-2A>G              | MH      | N.E.        |
| BRCA2.13                   | DSC2    | <b>p.Ala897Lysfs*4</b>   | ARVC    | N.D.        |
| BRCA2.14                   | DSC2    | <b>p.Ala897Lysfs*4</b>   | ARVC    | N.D.        |
| BRCA2.67                   | GPD1L   | c.505+2T>G               | BRGDA2  | N.D.        |
| BRCA2.71                   | DSC2    | <b>p.Ala897Lysfs*4</b>   | ARVC    | N.D.        |
| BRCA2.84                   | PCSK9   | c.1863+1G>A              | FH      | N.D.        |
| BRCA2.98                   | CACNA1S | <b>p.Met1828Argfs*71</b> | MH      | N.E.        |
| BRCA2.101                  | MYL2    | p.Lys62*                 | HCM     | N.E.        |
| <i>Autosomal Recessive</i> |         |                          |         |             |
| BRCA1.10                   | PTS     | p.Leu26*                 | BH4D    | --          |
| BRCA1.26                   | INPP5B  | p.Arg859*                | LS      | --          |
| BRCA1.27                   | CFTR    | p.Gly542*                | CF      | --          |
| BRCA1.66                   | INPP5B  | p.Asn163*                | LS      | --          |
| BRCA1.105                  | SLC7A9  | p.Asn206Glufs*3          | CSNU    | --          |
| BRCA2.21                   | SLC37A4 | p.Cys243*                | GSDIb   | --          |
| BRCA2.28                   | LDLRAP1 | <b>p.His144Glnfs*27</b>  | FH      | --          |
| BRCA2.58                   | GAA     | <b>p.Pro238Argfs*31</b>  | GSDII   | --          |
| BRCA2.85                   | IDUA    | p.Trp402*                | MPS I   | --          |
| BRCA2.95                   | F5      | <b>p.Gly903Valfs*11</b>  | FV      | --          |

Abbreviations: ARVC = Arrhythmogenic right ventricular cardiomyopathy; BH4D = Tetrahydrobiopterin deficiency; BRGDA2 = Brugada syndrome-2; CF = Cystic fibrosis; CSNU = Cystinuria; FH = Familial hypercholesterolemia; FV = Factor V deficiency; GSDIb = Glycogen storage disease type Ib; GSDII = Glycogen storage disease, type II; HCM = Hypertrophic cardiomyopathy; LS = Lowe syndrome; MH = Malignant hyperthermia; MPS I = Mucopolysaccharidosis type I

\* Indel variants are shown in bold

N.D., no data available on non-cancer personal or family history

N.E., no evidence in the available personal and family history

-- disease not expected due to heterozygosity

**Table S15. Number of potentially pathogenic variants in cancer-associated genes in the non-*BRCA* cohort**

| Gene    | All Variants |          | LoF Variants |          | Gene    | All Variants |          | LoF Variants |          | Gene    | All Variants |          | LoF Variants |          |
|---------|--------------|----------|--------------|----------|---------|--------------|----------|--------------|----------|---------|--------------|----------|--------------|----------|
|         | Cases        | Variants | Cases        | Variants |         | Cases        | Variants | Cases        | Variants |         | Cases        | Variants | Cases        | Variants |
| BRCA2   | 15           | 15       | 0            | 0        | PTCH1   | 1            | 2        | 0            | 0        | SDHC    | 0            | 0        | 0            | 0        |
| APC     | 14           | 12       | 3            | 3        | FLCN    | 2            | 2        | 0            | 0        | SMAD4   | 0            | 0        | 0            | 0        |
| ATM     | 10           | 10       | 1            | 1        | GEN1    | 10           | 2        | 9            | 1        | CDKN2B  | 0            | 0        | 0            | 0        |
| PALB2   | 9            | 7        | 2            | 2        | EGFR    | 2            | 2        | 0            | 0        | MITF    | 0            | 0        | 0            | 0        |
| MSH6    | 9            | 7        | 3            | 3        | RAD51C  | 2            | 2        | 1            | 1        | NBN     | 0            | 0        | 0            | 0        |
| TSC2    | 5            | 5        | 0            | 0        | CDKN2A  | 2            | 2        | 0            | 0        | SDHB    | 0            | 0        | 0            | 0        |
| ATR     | 7            | 5        | 0            | 0        | CHEK1   | 2            | 2        | 0            | 0        | BMPR1A  | 0            | 0        | 0            | 0        |
| TP53BP1 | 5            | 5        | 0            | 0        | ELAC2   | 2            | 2        | 0            | 0        | CDK4    | 0            | 0        | 0            | 0        |
| MET     | 7            | 5        | 1            | 1        | MLH3    | 1            | 1        | 0            | 0        | CDKN1A  | 0            | 0        | 0            | 0        |
| SMO     | 7            | 5        | 0            | 0        | RB1     | 1            | 1        | 0            | 0        | KIT     | 0            | 0        | 0            | 0        |
| MUTYH   | 4            | 5        | 1            | 1        | TSC1    | 1            | 1        | 0            | 0        | NF2     | 0            | 0        | 0            | 0        |
| RET     | 5            | 5        | 0            | 0        | BLM     | 1            | 1        | 0            | 0        | VHL     | 0            | 0        | 0            | 0        |
| MSH2    | 4            | 4        | 1            | 1        | CDH1    | 1            | 1        | 0            | 0        | WT1     | 0            | 0        | 0            | 0        |
| KDR     | 4            | 4        | 0            | 0        | FAM175A | 1            | 1        | 0            | 0        | XRCC2   | 0            | 0        | 0            | 0        |
| RAD50   | 4            | 4        | 1            | 1        | EPCAM   | 1            | 1        | 0            | 0        | BRIP1   | 0            | 0        | 0            | 0        |
| MLH1    | 4            | 4        | 0            | 0        | GREM1   | 2            | 1        | 0            | 0        | CDC73   | 0            | 0        | 0            | 0        |
| BRCA1   | 5            | 4        | 0            | 0        | RAD51   | 1            | 1        | 0            | 0        | HOXB13  | 0            | 0        | 0            | 0        |
| PMS2    | 4            | 3        | 0            | 0        | XRCC3   | 1            | 1        | 0            | 0        | PTEN    | 0            | 0        | 0            | 0        |
| CREBBP  | 5            | 3        | 0            | 0        | FH      | 2            | 1        | 2            | 1        | RAD51D  | 0            | 0        | 0            | 0        |
| CHEK2   | 3            | 3        | 0            | 0        | MEN1    | 1            | 1        | 0            | 0        | RAS     | 0            | 0        | 0            | 0        |
| PDGFRA  | 3            | 3        | 0            | 0        | SDHAF2  | 2            | 1        | 0            | 0        | SDHD    | 0            | 0        | 0            | 0        |
| BARD1   | 22           | 3        | 0            | 0        | TP53    | 1            | 1        | 1            | 1        | SMARCB1 | 0            | 0        | 0            | 0        |
| NF1     | 4            | 3        | 0            | 0        | BAP1    | 0            | 0        | 0            | 0        | STK11   | 0            | 0        | 0            | 0        |
| MRE11A  | 2            | 2        | 0            | 0        | NTRK1   | 0            | 0        | 0            | 0        |         |              |          |              |          |
| JAK2    | 2            | 2        | 0            | 0        | GALNT12 | 0            | 0        | 0            | 0        |         |              |          |              |          |

"Potentially pathogenic" is defined as a nonsynonymous variant with a frequency <1% in both the Exome Variant Server (ESP6500) and HapMap control datasets  
LoF, loss-of-function nonsynonymous variants defined as SNVs predicted to create a premature truncation (nonsense, disrupt, misstart or nontstop) and indels resulting in a frameshift



**Table S16. Number of potentially pathogenic variants in disease genes (other than cancer) in the non-*BRCA* cohort**

| Gene         | All Variants |          | LoF Variants |          | Gene     | All Variants |          | LoF Variants |          | Gene     | All Variants |          | LoF Variants |          |
|--------------|--------------|----------|--------------|----------|----------|--------------|----------|--------------|----------|----------|--------------|----------|--------------|----------|
|              | Cases        | Variants | Cases        | Variants |          | Cases        | Variants | Cases        | Variants |          | Cases        | Variants | Cases        | Variants |
| APOB         | 14           | 15       | 0            | 0        | LDLR     | 2            | 2        | 0            | 0        | FBN1     | 0            | 0        | 0            | 0        |
| HTT          | 26           | 11       | 1            | 1        | IDUA     | 2            | 2        | 0            | 0        | SLC37A4  | 0            | 0        | 0            | 0        |
| <b>RYR1</b>  | 12           | 10       | <b>1</b>     | <b>1</b> | CPT2     | 2            | 2        | 0            | 0        | KCNH2    | 0            | 0        | 0            | 0        |
| CFTR         | 11           | 10       | 0            | 0        | KCNQ1    | 2            | 2        | 0            | 0        | HIP1     | 0            | 0        | 0            | 0        |
| ATP7B        | 9            | 8        | 0            | 0        | TGFB3    | 2            | 2        | 0            | 0        | HMBS     | 0            | 0        | 0            | 0        |
| DMD          | 8            | 7        | 0            | 0        | TGFBR2   | 2            | 2        | 0            | 0        | SERPINC1 | 0            | 0        | 0            | 0        |
| CACNA1S      | 43           | 7        | 0            | 0        | COQ9     | 2            | 2        | 0            | 0        | COQ2     | 0            | 0        | 0            | 0        |
| F5           | 7            | 7        | 0            | 0        | PROS1    | 3            | 2        | 0            | 0        | EMD      | 0            | 0        | 0            | 0        |
| HCN4         | 5            | 6        | 0            | 0        | KCNE3    | 3            | 2        | 0            | 0        | ACVRL1   | 0            | 0        | 0            | 0        |
| MYBPC3       | 6            | 6        | 0            | 0        | MYH11    | 2            | 1        | 0            | 0        | GPD1L    | 0            | 0        | 0            | 0        |
| PKP2         | 6            | 6        | 0            | 0        | BCHE     | 1            | 1        | 0            | 0        | HFE2     | 0            | 0        | 0            | 0        |
| SCN5A        | 7            | 6        | 0            | 0        | SLC7A9   | 1            | 1        | 0            | 0        | KCNJ2    | 2            | 0        | 0            | 0        |
| RBM20        | 5            | 6        | 0            | 0        | MYH7     | 1            | 1        | 0            | 0        | PRKAG2   | 0            | 0        | 0            | 0        |
| COL3A1       | 9            | 6        | 0            | 0        | KCNH1    | 1            | 1        | 0            | 0        | TNNT2    | 0            | 0        | 0            | 0        |
| CACNA1C      | 30           | 5        | 0            | 0        | SLC25A13 | 1            | 1        | 0            | 0        | LMNA     | 0            | 0        | 0            | 0        |
| DMPK         | 5            | 5        | 0            | 0        | TMEM43   | 3            | 1        | 0            | 0        | MYL3     | 0            | 0        | 0            | 0        |
| DSP          | 4            | 4        | 0            | 0        | CASQ2    | 1            | 1        | 0            | 0        | QDPR     | 0            | 0        | 0            | 0        |
| RYR2         | 4            | 4        | 0            | 0        | CNBP     | 1            | 1        | 0            | 0        | SCN1B    | 0            | 0        | 0            | 0        |
| GAA          | 4            | 4        | 0            | 0        | OTC      | 4            | 1        | 0            | 0        | ACTA2    | 0            | 0        | 0            | 0        |
| INPP5B       | 4            | 4        | 1            | 1        | HFE      | 4            | 1        | 0            | 0        | ACTC1    | 0            | 0        | 0            | 0        |
| <b>DSC2</b>  | 5            | 4        | <b>1</b>     | <b>1</b> | HAMP     | 1            | 1        | 0            | 0        | ENG      | 0            | 0        | 0            | 0        |
| MYLK         | 8            | 3        | 0            | 0        | GLA      | 1            | 1        | 0            | 0        | GCH1     | 0            | 0        | 0            | 0        |
| PAH          | 3            | 3        | 0            | 0        | MYL2     | 1            | 1        | 0            | 0        | PCBD1    | 0            | 0        | 0            | 0        |
| SERPINA1     | 7            | 3        | 0            | 0        | TGFBR1   | 1            | 1        | 0            | 0        | PLN      | 0            | 0        | 0            | 0        |
| <b>PCSK9</b> | 3            | 3        | <b>1</b>     | <b>1</b> | KCNE2    | 1            | 1        | 0            | 0        | PROC     | 0            | 0        | 0            | 0        |
| LDLRAP1      | 3            | 3        | 0            | 0        | HOXB1    | 3            | 1        | 0            | 0        | PTS      | 0            | 0        | 0            | 0        |
| PRSS1        | 2            | 2        | 0            | 0        | KCNE1    | 1            | 1        | 0            | 0        | SCN3B    | 0            | 0        | 0            | 0        |
| <b>DSG2</b>  | 2            | 2        | <b>1</b>     | <b>1</b> | TNNI3    | 1            | 1        | 0            | 0        | SGCD     | 0            | 0        | 0            | 0        |
| HIP1R        | 2            | 2        | 0            | 0        | PRKAR1A  | 1            | 1        | 0            | 0        | SMAD3    | 0            | 0        | 0            | 0        |
| CACNB2       | 4            | 2        | 0            | 0        | RBBP8    | 1            | 1        | 0            | 0        | TPM1     | 0            | 0        | 0            | 0        |

"Potentially pathogenic" is defined as a nonsynonymous variant with a frequency <1% in both the Exome Variant Server (ESP6500) and HapMap control datasets

LoF, loss-of-function nonsynonymous variants defined as SNVs predicted to create a premature truncation (nonsense, disrupt, misstart or nontstop) and indels resulting in a frameshift

**bold** = these patients' cardiac history did not reflect cardiomyopathy or in the case of *PCSK9* cholesterol was normal

**Table S17. Potentially pathogenic LoF SNVs in autosomal dominant ClinVar genes in non-*BRCA* cancer genetics individuals**

| Patient | Gene      | Variant      | Predicted Autosomal Dominant Disease                      |
|---------|-----------|--------------|-----------------------------------------------------------|
| UTSW1   | PSTPIP1   | c.985+2T>C   | Pyogenic arthritis, pyoderma gangrenosum and acne         |
| UTSW3   | TNFRSF13B | p.Ser144*    | Immunoglobulin A deficiency 2                             |
| UTSW3   | HLA-G     | c.2T>C       | Asthma, susceptibility to                                 |
| UTSW5   | MIB1      | p.Arg126*    | Left ventricular noncompaction 7                          |
| UTSW9   | HLA-G     | c.74-2A>G    | Asthma, susceptibility to                                 |
| UTSW10  | KRT83     | p.Cys222*    | Monilethrix                                               |
| UTSW11  | MASTL     | p.Gln709*    | Thrombocytopenia 2                                        |
| UTSW11  | FLG       | p.Arg1474*   | Ichthyosis vulgaris                                       |
| UTSW12  | KRT83     | p.Cys222*    | Monilethrix                                               |
| UTSW13  | IGF2      | c.-3-1G>A    | Russell-Silver syndrome                                   |
| UTSW15  | ANKRD26   | c.3G>A       | Thrombocytopenia 2                                        |
| UTSW16  | GJA8      | p.Gln116*    | Cataract 1                                                |
| UTSW16  | IGF2      | c.-3-1G>A    | Russell-Silver syndrome                                   |
| UTSW16  | TNXB      | p.Glu316*    | Ehlers-Danlos syndrome, type 3                            |
| UTSW18  | TRPM4     | c.2778+1G>A  | Progressive familial heart block type 1B                  |
| UTSW21  | PRPF8     | p.Arg663*    | Retinitis pigmentosa 13                                   |
| UTSW23  | KRT83     | p.Cys222*    | Monilethrix                                               |
| UTSW27  | TNFRSF11A | c.730+1G>T   | Osteoporosis 7; Paget disease of bone                     |
| UTSW30  | PRKCSH    | c.-77-2A>C   | Congenital cystic disease of liver                        |
| UTSW31  | CLCN2     | c.898+1G>A   | Epilepsy with grand mal seizures on awakening             |
| UTSW36  | GUCA1B    | c.207+1G>A   | Retinitis pigmentosa 48                                   |
| UTSW36  | SLC16A12  | c.-186-2A>T  | Cataract, juvenile, with microcornea and glucosuria       |
| UTSW37  | LRRK2     | p.Cys1313*   | Parkinson disease 8                                       |
| UTSW38  | IGF2      | c.-3-1G>A    | Russell-Silver syndrome                                   |
| UTSW40  | TTN       | c.30812-1G>A | Familial hypertrophic cardiomyopathy 9                    |
| UTSW40  | PADI4     | c.1A>G       | Rheumatoid arthritis                                      |
| UTSW41  | HABP2     | p.Arg177*    | Thrombophilia; Deep vein thrombosis                       |
| UTSW42  | SLC16A12  | c.-182-2A>T  | Cataract, juvenile, with microcornea and glucosuria       |
| UTSW44  | FLG       | p.Arg501*    | Ichthyosis vulgaris                                       |
| UTSW45  | SCN2A     | c.-52+1G>T   | Benign familial neonatal-infantile seizures               |
| UTSW51  | NAT2      | c.-7+2T>C    | Slow acetylator due to N-acetyltransferase enzyme variant |
| UTSW52  | NAT2      | c.-7+2T>C    | Slow acetylator due to N-acetyltransferase enzyme variant |
| UTSW53  | BCMO1     | c.1102-1G>A  | Vitamin a deficiency                                      |
| UTSW55  | NME1      | c.-149-1G>C  | Neuroblastoma                                             |
| UTSW57  | CYP3A5    | p.Leu249*    | Essential hypertension                                    |
| UTSW64  | COL9A2    | c.303+2T>C   | Multiple epiphyseal dysplasia 2                           |
| UTSW67  | PDE11A    | p.Arg101*    | Nodular adrenocortical disease, primary; Cushing syndrome |
| UTSW69  | LDB3      | p.Arg219*    | Dilated cardiomyopathy; Myofibrillar myopathy             |
| UTSW70  | KRT83     | p.Cys222*    | Monilethrix                                               |
| UTSW70  | MIB1      | p.Arg676*    | Left ventricular noncompaction 7                          |
| UTSW72  | AGBL1     | p.Arg1028*   | Corneal dystrophy, fuchs endothelial, 8                   |
| UTSW73  | PRKCSH    | c.-77-2A>C   | Congenital cystic disease of liver                        |
| UTSW78  | MET       | p.Arg1148*   | Hepatocellular carcinoma; RCC, papillary                  |
| UTSW80  | CALCR     | c.-43-2A>G   | Osteoporosis                                              |
| UTSW80  | IGF2      | p.Gln33*     | Russell-Silver syndrome                                   |
| UTSW84  | FLG       | p.Arg501*    | Ichthyosis vulgaris                                       |
